# Supplementary material for: Carbon footprint of plastic from biomass and recycled feedstock: methodological insights
Source: Springer Nature journal article supplement (doi:10.1007/s11367-020-01853-2), 2021-01-21
Supplement: MOESM1 [file 18789060]

# 1 To what extent is the Circular Footprint Formula of the Product

## 2 Environmental Footprint Guide consequential?

3

4 Dieuwertje L. Schrijvers<sup>1</sup>, Philippe Loubet<sup>1\*</sup>, Bo P. Weidema<sup>2</sup>

5 <sup>1</sup> Univ. Bordeaux, CNRS, Bordeaux INP, ISM, UMR 5255, F-33400, Talence, France

6 <sup>2</sup> Aalborg University, Rendsburggade 14, 9000 Aalborg, Denmark

7 \*philippe.loubet@enscbp.fr

## 8 Abstract

9 With the ambition to increase the comparability of LCA results, the European Commission developed the  
10 Product Environmental Footprint (PEF) Guide. This Guide contains a formula to model a product's end-of-  
11 life, allowing for waste treatment, energy recovery, and recycling: The Circular Footprint Formula (CFF).  
12 The CFF considers the market situation of recycled materials and models recycling via substitution, which  
13 is in line with a consequential LCA (CLCA) approach. Therefore, the question that is raised is *"Is the CFF is*  
14 *indeed consistent with CLCA, and if not, what are the main differences between the CFF and CLCA*  
15 *approaches?"* To facilitate this comparison, a Causal Loop Diagram (CLD) has been developed that  
16 summarizes current CLCA practice. From this CLD, a formula has been derived: the market-driven  
17 substitution approach, which is compared to the CFF. We conclude that the CFF is partially consistent with  
18 a consequential approach. The main discrepancies of the CFF compared to a consequential approach are  
19 1) the lack of differentiation between the marginal production processes and users and the specific value  
20 chain of the life cycle under study, 2) limitations in the extent to which substitution can be modeled, and  
21 3) an incomplete modeling of the effects of recycling when demand is constrained. Furthermore, some  
22 parameters in the CFF combine several consequences, which could result in misinterpretations and a lack

23 of transparency of the modeled substitutions. We suggest improvements to the CFF, contributing to  
24 harmonizing the application of substitution and the comparability of products assessed according to the  
25 PEF Guide.

## 26 1. Introduction

27 Comparability of LCA results beyond pre-defined studies is an important requirement for consumers to  
28 make environmentally informed decisions in the marketplace. However, comparability of results is often  
29 limited by the numerous choices that an LCA practitioner can make throughout his or her study. One of  
30 these choices having a large impact on the final results is how the end of life of a product is modeled,  
31 especially when this product is recycled (Laurent et al., 2014; Merrild et al., 2008). The European  
32 Commission has as ambition to develop an LCA approach that can be applied consistently to a large range  
33 of products, presented in the Product Environmental Footprint (PEF) Guide (European Commission, 2013).  
34 The guidance presented in 2013 included an end-of-life formula, applicable to a wide range of end-of-life  
35 scenarios, such as landfilling, energy recovery, and recycling. Environmental burdens and credits due to  
36 recycling were equally shared between the producer and the user of the recycled material, following the  
37 “50/50 method”. However, this 50/50 method has led to much criticism in the LCA domain. The 50/50  
38 method models environmental impacts that are in some cases unrealistic, since it requires that specific  
39 waste treatments at the end of life (e.g. by landfilling) be modeled, even if this waste treatment does not  
40 take place in reality (Finkbeiner, 2013). Stakeholders in the metals sector argued that the 50/50 method  
41 favors incineration over recycling, since the benefits of energy recovery are modeled with 100% credit to  
42 the producer of the material. Furthermore, modeling environmental benefits of recycling (by avoiding the  
43 primary production of a material) only by 50% is not representative for many metals, since recycling might  
44 in some cases substitute primary production by 100% (Eurofer et al., 2013). Also (Schrijvers et al., 2016a)  
45 highlighted that the application of the 50/50 method does not consider the different market situations of  
46 recycled materials.

47 In response to such criticism and user feedback, the European Commission continued the development of  
48 an end-of-life formula for the PEF Guide, and proposed an updated formula in 2016: the Circular Footprint  
49 Formula (CFF) (Zampori et al., 2016). The CFF is now integrated into more recent guidance to develop PEF  
50 Category Rules (PEFCRs) (European Commission, 2018). The main difference to the 50/50 method is that  
51 the environmental burdens and benefits of recycling are now not always equally shared between the user  
52 and the producer of the recycled material, but are shared according to a market-parameter *A*. This  
53 parameter reflects whether the demand for the recycled material is high or low compared to the  
54 production rate. In this way, the CFF resembles the substitution methods that are applied in consequential  
55 modeling (Schrijvers et al., 2016b). Therefore, the question that is raised in this paper is whether the CFF  
56 is consistent with a consequential LCA approach, and if not, what are the main differences between the  
57 CFF and full consequential modeling? It should be noted that the CFF does not explicitly claim to follow a  
58 consequential modelling approach. However, answering this question can help to identify whether the CFF  
59 can be used outside the scope of the PEF Guide, and whether recycling can lead to environmental  
60 consequences that are currently not represented in a Product Environmental Footprint.

## 61 2. Methods

62 The CFF is presented in the form of a formula. In order to evaluate whether the CFF follows a consequential  
63 approach, we express the consequential LCA (CLCA) method in the form of a formula as well. The formula  
64 for CLCA, which we call “the market-driven substitution method”, is established by first developing a  
65 Causal Loop Diagram (CLD) that summarizes the effects that are modeled in a CLCA – covering the  
66 application of CLCA as described by Ekvall and Weidema (2004), Weidema et al. (2009), and as  
67 implemented in ecoinvent v.3 (Weidema et al., 2013). Subsequently, the elements of the CLD are  
68 expressed in mathematical terms. The Supporting Information (SI) provides an illustrative application  
69 example of the “market-driven substitution method”. The CFF is presented, and the terms of the CFF are

70 linked to the terms of the market-driven substitution method. This permits to see in detail where the  
71 formulas differ or concur. Finally, the differences and their consequences are discussed.

## 72 3. Results and discussion

### 73 3.1. A Causal Loop Diagram for modeling a consequential LCI

74 The consequences of a demand for a certain function, which generally leads to the demand for, or supply  
75 of, products, can be summarized in a Causal Loop Diagram (CLD) as shown in Figure 1. While CLDs have  
76 been used before in the context of CLCA to represent specific effects, such as the rate at which a recycled  
77 material can displace a primary material (Zink et al., 2016), the diagram of Figure 1 is comprehensive by  
78 visualizing all the effects that must be taken into consideration in the assessment of a changed demand  
79 for a function a CLCA.

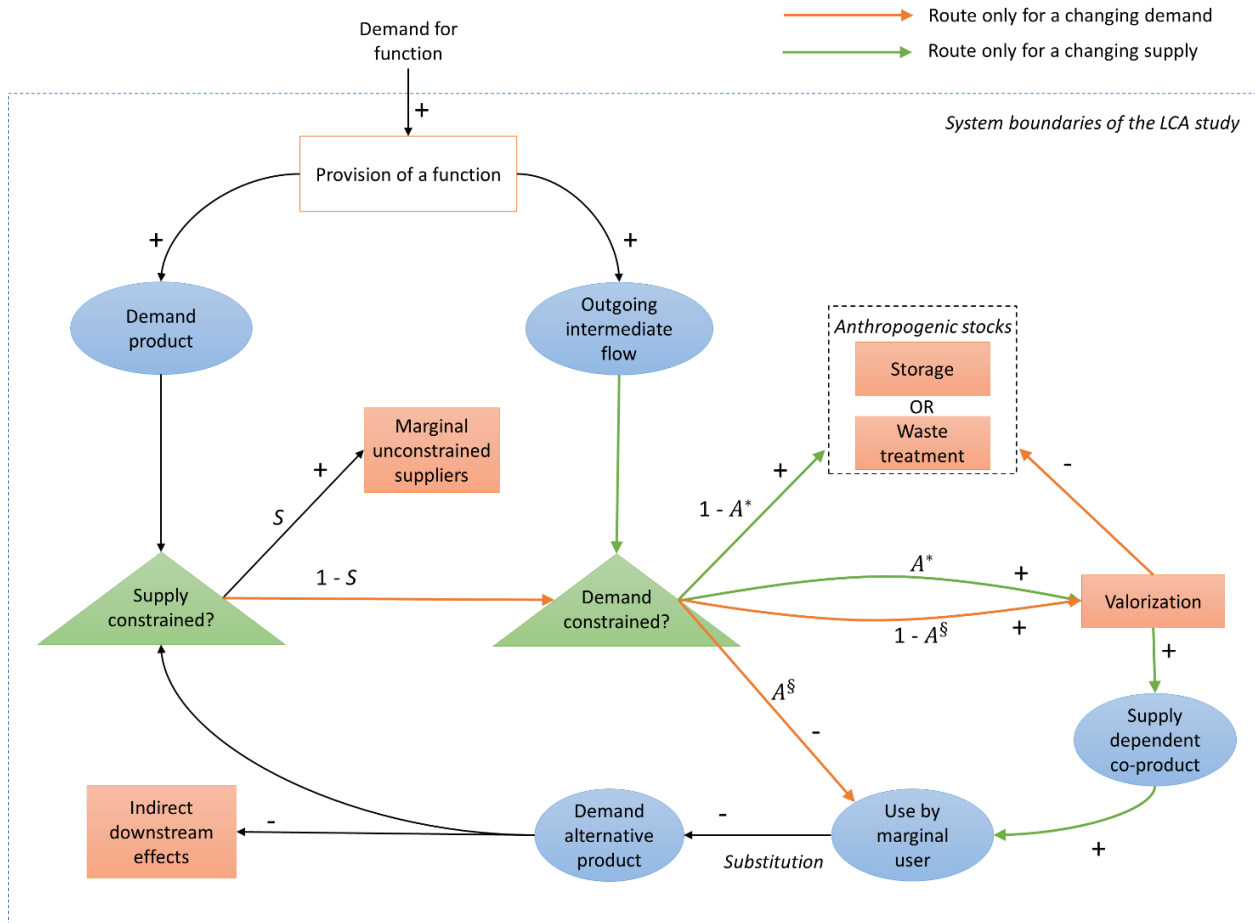

80  
 81 Figure 1 Causal Loop Diagram showing the market-induced consequences of a changing demand for a function. The arrows  
 82 reflect causal relationships which can be positive (increased X causes an increased Y; indicated by a plus) or negative (increased X  
 83 causes a decreased Y; indicated by a minus). Blue circles refer to flows of material/energy. Green triangles indicate context-  
 84 dependent economic factors, which affect the expected consequences. Orange boxes refer to activities that are modeled in the  
 85 LCI; each solid filled box represents a set of incoming and outgoing intermediate flows.  $S$  represents the level of supply  
 86 constraints for a demanded product:  $S = 1$  for unconstrained supply,  $S = 0$  for fully constrained supply. The green arrows and  
 87  $A^*$  represent an outgoing intermediate flow and the orange arrows and  $A^S$  represent an incoming intermediate flow:  $A^*/S = 1$  for  
 88 unconstrained demand,  $A^*/S = 0$  for fully constrained demand.

89 3.1.1. Elements of the Causal Loop Diagram

90 **Provision of a function:** The demand for a function leads to a fulfilment of this function, which is can be  
 91 considered as a unit process with elementary flows (not indicated in the CLD), incoming product flows,  
 92 and outgoing intermediate flows. For example, the demand for the function “obtaining news from a

93 newspaper” has the incoming flow of the demanded newspaper, and the outgoing intermediate flow of  
94 the end-of-life newspaper. If the effects of an incoming waste flow need to be modeled, the incoming  
95 waste is modeled as a negative outgoing intermediate flow.

96 *Demand product:* The functional unit in a CLCA is often represented by an increasing or decreasing demand  
97 for one or more (recycled or primary) products – i.e. the reference flow, which results in a cascade of  
98 increased or decreased demands for intermediate flows related to the production of this reference flow.  
99 “Demand product” represents one of these increased or decreased demands at a time. The consequences  
100 of the changing demand of each product is assessed separately. If a product contains both primary and  
101 recycled materials that can be distinguished as such and this is communicated on the market, these are  
102 considered to be two separate materials that need to be analyzed independently as well.

103 *Outgoing intermediate flow:* The intermediate flows that result from the provision of the function are  
104 modeled as “outgoing intermediate flow”, which contain wastes, materials that need further processing,  
105 or dependent co-products, if no further processing is needed (in that case, the LCI of “valorization” could  
106 be zero). Outgoing intermediate flows affect marginal valorization, when an economically viable  
107 valorization activity exists that transforms the intermediate flow into a dependent co-product for which  
108 there is unmet demand. Otherwise, the flow affects marginal waste treatment or storage.

109 *Supply constrained:* The existence of supply constraints determines the first line of consequences of the  
110 changing demand for a product. The level of supply constraints is indicated in Figure 1 with the value  $S$ . If  
111 supply is unconstrained,  $S = 1$ . If the supply is fully constrained,  $S = 0$ . The level of supply constraints is  
112 often generalized for determining and dependent co-products. A determining co-product is defined as a  
113 co-product “for which a change in demand will affect the production volume of the co-producing unit  
114 process” (Weidema et al., 2009), and thus not supply constrained. Guidance in the identification of the  
115 determining co-product is provided by Consequential-LCA (2015). Generally, it is assumed in LCI, as well

116 as in the ecoinvent 3 database, that the supply of a determining co-product is fully elastic (i.e.  $S = 1$ )  
117 (Weidema et al., 2013), meaning that a change in demand is followed by an equal change in supply. This  
118 assumption is valid for competitive markets in the long term (Weidema et al., 2009). For dependent co-  
119 products, supply is ultimately constrained by the demand for the determining co-product. Therefore, the  
120 default value for recycled products and by-products is  $S = 0$ .

121 *Marginal unconstrained suppliers:* To the extent that supply is unconstrained, the demand for a product  
122 will result in a corresponding increase in production by the marginal supplier.

123 *Demand constrained:* Dependent co-products, either demanded to provide a function, or supplied by a  
124 valorization activity, can be in high demand or in low demand, indicated by Parameter A. If the demand  
125 for the product is larger than the constrained supply, the demand is unconstrained and  $A = 1$ . If, however,  
126 the market is saturated and an additionally available unit of the product will not be used, demand is  
127 constrained and  $A = 0$ . The situation  $0 < A < 1$  may occur in the short term, when markets are affected by  
128 short-term constraints, but since a marginal change in demand for a material that is supply constrained  
129 does not affect the long-term opportunity costs (the costs of valorization, storage and waste treatment),  
130 the long-term situation will tend towards  $A=0$ , i.e. the entire additional demand will be met by decreasing  
131 marginal storage or waste treatment. The situation  $0 < A < 1$  may also occur as an average over  
132 geographical areas or time periods, where  $A=1$  in some subset of geographical areas or time periods, and  
133  $A=0$  in other subsets. A changed demand for a product with unconstrained demand (i.e.  $A = 1$ ) affects the  
134 use of this product by the marginal user, who can substitute the use of this product by an alternative  
135 product. If the demand is however constrained, a changed demand affects the valorization of this product  
136 from anthropogenic stocks (i.e. waste or stored materials). A changed supply of an intermediate flow  
137 affects either waste treatment/storage, or the valorization of this flow resulting in the production of the  
138 dependent co-product, which serves in the determination of A. If there is unmet demand ( $A = 1$ ), the  
139 intermediate flow will be valorized and the dependent co-product is used by its marginal user. If the

140 demand is lower than the availability of the intermediate flow ( $A < 1$ ), only waste treatment and storage –  
141 not valorization – are affected.

142 *Use by marginal user:* If the demand for a supply-constrained product is not constrained, i.e. if the demand  
143 exceeds the constrained supply, the consequence of an additional demand for this product is a reduced  
144 use of this supply-constrained product in another product value chain. The marginal user that is affected  
145 could be identified by a high elasticity of demand, meaning that a small change in the price of a product  
146 will lead to a large change in demand for this product. The user of this product can most easily accept a  
147 reduction in use or substitute the supply-constrained product for an alternative material or product that  
148 fulfills the same function.

149 *Demand alternative product:* The decreased or increased use of a supply-constrained product in other  
150 applications can lead to the increased or decreased demand for an alternative product, respectively – i.e.  
151 substitution. This alternative product could be identified by cross-price elasticities of the materials that  
152 show whether a change in the price of one product results in a change in demand for the alternative  
153 product. Note that this alternative product is the one consumed by the marginal user, which is not  
154 necessarily the same user as the operator of the foreground subsystem of the CLCA.

155 *Indirect downstream effects:* Due to the use of an alternative product, indirect effects could take place  
156 downstream, in distribution, use, and end-of-life treatment, when the substituted products do not have  
157 exactly the same properties. If substitution does not take place on a one-to-one elemental level, but on a  
158 product function or technology level, differences in technology efficiencies and system design must be  
159 considered as well. Note that, due to the negative causal relation between “demand alternative product”  
160 and “indirect downstream effects”, these downstream effects are defined as the downstream inventory  
161 related to the product under study *minus* the downstream inventory related to the alternative product.  
162 Also rebound effects can be considered within the box “indirect downstream effects”.



163 *Anthropogenic stocks:* Anthropogenic stocks are the marginal supplier of dependent co-products for which  
164 demand is less than the supply. If anthropogenic stocks are affected, this is modeled as the storage of the  
165 dependent co-products that are not taken into use yet, or as the potential waste treatment of end-of-life  
166 products.

167 *Valorization:* Valorization of a material comprises all activities that take place to make a waste or a co-  
168 product a valuable material. This includes sorting and recycling activities, or the incineration activity that  
169 is required for energy recovery (energetic valorization).

170 *Supply dependent co-product:* The valorization activity supplies a dependent co-product. Demand  
171 constraints (i.e. the determination of A) are identified for this material to evaluate the consequences of a  
172 changing supply of an outgoing intermediate flow.

### 173 3.1.2. *End-of-life recycling rate within the CLD*

174 The CLD shows activities that are likely to take place when an intermediate flow is taken from, or put on  
175 the market. It can be noticed that the CLD does not contain a recycling rate – here defined as the share  
176 of an outgoing intermediate flow which is sent to a valorization activity. The supply of, or demand for, a  
177 material affects valorization via market mechanisms if there is an economically viable valorization  
178 activity that supplies a product which is in high demand. Whereas the share of a material flow that is  
179 sent to recycling can be determined by players within a value chain (e.g. by the collective action of  
180 individuals, through policy, or by a company), the total amount of recycled material (i.e. the supplied  
181 dependent co-product) that is finally used in products or applications, and which can substitute a  
182 primary material, is determined by market mechanisms. If the amount of material that is sent to  
183 valorization within a certain product system is known, the valorization process is modeled within the  
184 foreground subsystem – which contains processes that are known to be directly affected by the  
185 functional unit, as shown in Figure 2. The dependent co-product that is supplied by the valorization  
186 activity is put on the market, and the CLD can be used to model the subsequent effects of this action.

187 The recycled material can be supplied, regardless whether there is a demand for this material. Therefore,  
 188 it should be considered that the recycled material produced by the processes within the foreground  
 189 subsystem might either substitute a virgin material (if the demand for the recycled material is high), or a  
 190 recycled material from other product value chains (if the demand is low). Following the CLD, the node  
 191 “demand alternative product” should first be evaluated for recycled materials from other value chains. If  
 192 demand is high (i.e.  $A = 1$ ), this recycled material will be increasingly used to substitute a primary  
 193 material in a second iteration of consequences. If demand is low ( $A < 1$ ), the valorization and waste  
 194 treatment of this alternative recycled material will be affected.

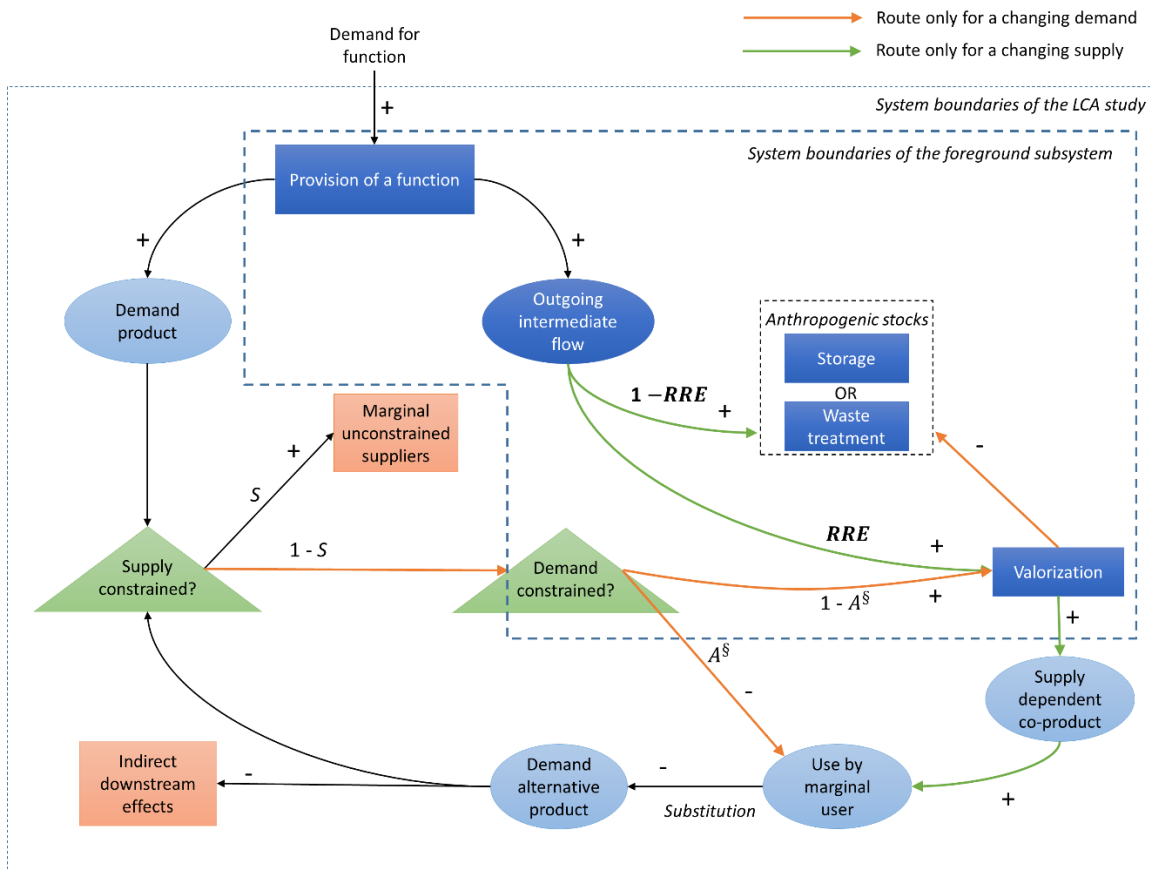

195

196 *Figure 2 Causal Loop Diagram showing the system boundaries of the foreground subsystem with a determined end-of-life*  
 197 *recycling rate (RRE) of an outgoing intermediate flow. Processes that are part of the foreground subsystem are indicated by a*  
 198 *dark blue color.*

199 3.2. The market-driven substitution method

200 In this section, the effects that are modeled by the CLD of Figure 1 are captured by a mathematical  
 201 formula. The SI presents an example illustrating the link between the CLD and the formula. To enable the  
 202 comparison with the CFF in Section 3.4, the market-driven substitution formula is presented in a modular  
 203 form in Equations E1-E4. Whereas each input and output material should be modeled separately in a  
 204 CLCA, Equation E2 reflects a combined case where one primary material and one recycled material are  
 205 used, and where one recycled material is supplied at the end of life, which may or may not be the same  
 206 as the consumed recycled material. The parameters of the formula are given in Table 1.

207 E1.  $E_{tot} = E_{tot,material} + E_{tot,energy} + E_{tot,disposal}$

208 E2.  $E_{tot,material} = (1 - RC) * E_v + RC * \left( (1 - A^S) * \left( E_r^S - \frac{E_d^S}{C^S} \right) - A^S * \frac{Q^S}{Q_v^S} * (\Delta E_\alpha^S - E_v^S) \right) + RRE_{rec} *$

209  $C_{rec} * \left( E_{r,rec} - (1 - A^*) * \left( E_r^* - \frac{E_d^*}{C^*} \right) + A^* * \frac{Q^*}{Q_v^*} * (\Delta E_\alpha^* - E_v^*) \right)$

210 E3.  $E_{tot,energy} = RRE_{inc} * (E_{RRE,inc} - C_{elec} * E_v^*)$

211 E4.  $E_{tot,disposal} = (1 - RRE_{inc} - RRE_{rec}) * E_d$

212 Table 1 Explanation of terms of the market-driven substitution method presented in Equations E2-E5

| Term of the market-driven substitution method | Explanation                                                                                         | Value                  |
|-----------------------------------------------|-----------------------------------------------------------------------------------------------------|------------------------|
| $E_{tot}$                                     | Life Cycle Inventory (LCI) caused by the demand for the product under study via a consequential LCA | LCI / unit of analysis |

|               |                                                                                                                                                                                        |                                               |
|---------------|----------------------------------------------------------------------------------------------------------------------------------------------------------------------------------------|-----------------------------------------------|
| $E_v$         | LCI caused by the extraction and processing of primary (virgin) materials via the marginal production process (including processing inefficiencies)                                    | LCI / unit of primary material                |
| $E_v^{\$}$    | LCI caused by the extraction and processing of the primary (virgin) materials that are substituted by the marginal user of the demanded material (including processing inefficiencies) | LCI / unit of primary material                |
| $E_v^*$       | LCI caused by the extraction and processing of the primary (virgin) materials that are substituted by the marginal user of the supplied material (including processing inefficiencies) | LCI / unit of primary material                |
| $E_{r,rec}$   | LCI caused by the production of the supplied recycled material (including LCI of losses during the recycling process)                                                                  | LCI / unit of produced recycled material      |
| $E_r^{\$}$    | LCI caused by the production of the demanded recycled material via the marginal valorization process (including LCI of losses during the recycling process)                            | LCI / unit of produced recycled material      |
| $E_r^*$       | LCI caused by the production of the supplied recycled material via the marginal valorization process (including LCI of losses during the recycling process)                            | LCI / unit of produced recycled material      |
| $E_{RRE,inc}$ | LCI caused by the incineration of the end-of-life product (including LCI of losses during the recovery process)                                                                        | LCI / unit of incinerated end-of-life product |

|                     |                                                                                                                                                                                                                                                         |                                                                  |
|---------------------|---------------------------------------------------------------------------------------------------------------------------------------------------------------------------------------------------------------------------------------------------------|------------------------------------------------------------------|
| $E_d$               | LCI caused by waste treatment or storage                                                                                                                                                                                                                | LCI / unit of discarded or stored material                       |
| $E_d^S$             | LCI caused by the waste treatment or storage of the demanded recycled product via the marginal treatment process                                                                                                                                        | LCI / unit of discarded or stored material                       |
| $E_d^*$             | LCI caused by the waste treatment or storage of the supplied recycled product via the marginal treatment process                                                                                                                                        | LCI / unit of discarded or stored material                       |
| $\frac{Q^S}{Q_v^S}$ | Quantity-correction factor that indicates the amount of a primary material that is substituted by the demanded recycled material by its marginal user                                                                                                   | Unit of substituted primary material / unit of recycled material |
| $\frac{Q^*}{Q_v^*}$ | Quantity-correction factor that indicates the amount of a primary material that is substituted by the supplied recycled material by its marginal user                                                                                                   | Unit of substituted primary material / unit of recycled material |
| $\Delta E_\alpha^S$ | LCI due to additional (+) and/or decreased (-) downstream intermediate or elementary flows related to the distribution, use, and disposal of the recycled material instead of a primary material by the marginal user of the demanded recycled material | LCI / unit of substituted primary material                       |
| $\Delta E_\alpha^*$ | LCI due to additional (+) and/or decreased (-) downstream intermediate or elementary flows related to the distribution, use, and disposal of the recycled material instead of a primary material by the marginal user of the supplied recycled material | LCI / unit of substituted primary material                       |

|             |                                                                                                                                                                  |                                                |
|-------------|------------------------------------------------------------------------------------------------------------------------------------------------------------------|------------------------------------------------|
| $RC$        | Recycled content (recycled or recovered material input per unit of analysis)                                                                                     | $0 \leq RC \leq 1$                             |
| $RRE_{rec}$ | End-of-life recycling rate (share of the product at the end of life that is sent to recycling)                                                                   | $0 \leq RRE_{rec} \leq 1$                      |
| $RRE_{inc}$ | End-of-life incineration rate (share of the product at the end of life that is sent to incineration)                                                             | $0 \leq RRE_{inc} \leq 1$                      |
| $C_{rec}$   | Conversion efficiency of the end-of-life product into a recycled material                                                                                        | Unit of useful output / unit of input material |
| $C_{elec}$  | Conversion efficiency of the end-of-life product into recovered electricity                                                                                      | Unit of useful output / unit of input material |
| $C^{\S}$    | Conversion efficiency of the end-of-life product into a recycled material via the marginal valorization process of the demanded recycled material                | Unit of useful output / unit of input material |
| $C^*$       | Conversion efficiency of the end-of-life product into a recycled material via the marginal valorization process of the supplied recycled material                | Unit of useful output / unit of input material |
| $A^{\S}$    | Indicator for demand constraints of the used recycled material ( $A^{\S} = 0$ reflects fully constrained demand; $A^{\S}=1$ reflects fully unconstrained demand) | $0 \leq A^{\S} \leq 1$                         |
| $A^*$       | Indicator for demand constraints of the supplied recycled material ( $A^* = 0$ reflects fully constrained demand; $A^*=1$ reflects fully unconstrained demand)   | $0 \leq A^* \leq 1$                            |

214 3.3. Circular Footprint Formula

215 The European Commission (European Commission, 2018; Zampori et al., 2016) proposed a Circular  
 216 Footprint Formula (CFF) to replace the End-of-Life formula of the PEF Guide (European Commission, 2013).  
 217 The latest version of this formula shows similarities with the formulas provided in Section 3.2 of this paper.  
 218 The CFF is a combination of three equations that calculate the impacts and benefits related to the use and  
 219 supply of materials, the recovery of energy, and disposal (Equations E6-E9). The terms of these equations  
 220 are explained and compared with the terms of the market-driven substitution method in Table 2.

221 E5.  $CFF_{total} = CFF_{material} + CFF_{energy} + CFF_{disposal}$

222 E6.  $CFF_{material} = (1 - R_1) * E_v + R_1 * \left( A_{CFF} * E_{recycled} + (1 - A_{CFF}) * E_v * \frac{Q_{Sin}}{Q_P} \right) + (1 - A_{CFF}) * R_2 * \left( E_{recyclingEoL} - E_v^* * \frac{Q_{Sout}}{Q_P} \right)$

224 E7.  $CFF_{energy} = (1 - B) * R_3 * (E_{ER} - LHV * X_{ER,heat} * E_{SE,heat} - LHV * X_{ER,elec} * E_{SE,elec})$

225 E8.  $CFF_{disposal} = (1 - R_2 - R_3) * E_d$

226 Table 2 Terms of the Circular Footprint Formula and their equivalence with the terms of the market-driven substitution formula

| Term of the CFF | Explanation (European Commission, 2018)                                                                        | Equivalent term of the market-driven substitution method |
|-----------------|----------------------------------------------------------------------------------------------------------------|----------------------------------------------------------|
| $CFF_{total}$   | Life Cycle Inventory (LCI) caused by the demand for the product under study via the Circular Footprint Formula | $E_{tot}$                                                |
| $A_{CFF}$       | Allocation factor of burdens and credits between supplier and user of recycled materials                       | $(1 - A^S)$ and $(1 - A^*)$                              |
| $B$             | Allocation factor of energy recovery processes: it applies both to burdens and credits                         | $(1 - A^*)$                                              |

|                    |                                                                                                                                                                                                                                                                             |                         |
|--------------------|-----------------------------------------------------------------------------------------------------------------------------------------------------------------------------------------------------------------------------------------------------------------------------|-------------------------|
| $Q_{Sin}$          | Quality of the ingoing secondary material, i.e. the quality of the recycled material at the point of substitution                                                                                                                                                           | $Q^S$                   |
| $Q_{Sout}$         | Quality of the outgoing secondary material, i.e. the quality of the recyclable material at the point of substitution                                                                                                                                                        | $Q^*$                   |
| $Q_P$              | Quality of the primary material, i.e. quality of the virgin material                                                                                                                                                                                                        | $Q_v^S$ and $Q_v^*$     |
| $R_1$              | Proportion of material in the input to the production that has been recycled from a previous system                                                                                                                                                                         | $RC$                    |
| $R_2$              | Proportion of the material in the product that will be recycled (or reused) in a subsequent system. R2 shall therefore take into account the inefficiencies in the collection and recycling (or reuse) processes. R2 shall be measured at the output of the recycling plant | $RRE_{rec} * C_{rec}$   |
| $R_3$              | Proportion of the material in the product that is used for energy recovery at EoL                                                                                                                                                                                           | $RRE_{inc}$             |
| $E_{recycled}$     | Specific emissions and resources consumed (per functional unit) arising from the recycling process of the recycled (reused) material, including collection, sorting and transportation process                                                                              | $E_r^S$                 |
| $E_{recyclingEoL}$ | Specific emissions and resources consumed (per functional unit) arising from the recycling process at EoL, including collection, sorting, and transportation process                                                                                                        | $E_{r,rec}$ and $E_r^*$ |



|                                 |                                                                                                                                                                                       |                                                                                       |
|---------------------------------|---------------------------------------------------------------------------------------------------------------------------------------------------------------------------------------|---------------------------------------------------------------------------------------|
| $E_v$                           | Specific emissions and resources consumed (per functional unit) arising from the acquisition and pre-processing of virgin material                                                    | $E_v$ and $E_v^S$                                                                     |
| $E_v^*$                         | Specific emissions and resources consumed (per functional unit) arising from the acquisition and pre-processing of virgin material assumed to be substituted by recyclable materials  | $E_v^*$ (if $E_v^S = E_v^*$ ) or $E_v^* * \frac{Q^*}{Q_v^*}$ (if $E_v^S \neq E_v^*$ ) |
| $E_{ER}$                        | Specific emissions and resources consumed (per functional unit) arising from the energy recovery process (e.g. incineration with energy recovery, landfill with energy recovery, ...) | $E_{RRE,inc}$                                                                         |
| $E_{SE,heat}$ and $E_{SE,elec}$ | Specific emissions and resources consumed (per functional unit) that would have arisen from the specific substituted energy source, heat and electricity respectively                 | $E_v^*$                                                                               |
| $E_d$                           | Specific emissions and resources consumed (per functional unit) arising from disposal of waste material at the EoL of the analysed product, without energy recovery                   | $E_d$                                                                                 |
| $X_{ER,heat}$ and $X_{ER,elec}$ | The efficiency of the energy recovery process for both heat and electricity                                                                                                           | $C_{heat}^1$ and $C_{elec}$                                                           |
| $LHV$                           | Lower Heating Value of the material in the product that is used for energy recovery                                                                                                   |                                                                                       |

<sup>1</sup> In our formula for the market-driven substitution method there is no explicit parameter for recovered heat, but this would be calculated in the same way as for recovered electricity.

228 3.4. Comparison of the Circular Footprint Formula with the market-driven substitution  
229 method

230 The differences and similarities between the CLCA method (via the market-driven substitution method)  
231 and the CFF are identified, term by term, in Table 3. The main differences and their consequences are  
232 discussed below.

233 3.4.1. *Marginal processes and marginal users*

234 In CLCA, processes in the background subsystem are marginal production and treatment processes, while  
235 this is not an explicit requirement in the CFF. Therefore, the LCA practitioner applying the CFF might select  
236 a production or treatment process that is different from the marginal process. The CFF would only be  
237 consistent with the CLCA approach when all the processes within the value chain of the product under  
238 study are also the marginal processes.

239 The primary material that is used in the product under study ( $E_p$  in the market-driven substitution method)  
240 is not necessarily the same as the primary material that is used by the marginal user of this recycled  
241 material. This is taken into account in the CFF by the substitution of an alternative primary material,  
242 denoted as  $E_p^*$ , by the supplied recycled material. However, this is not considered for the recycled content.  
243 This can be, for example, relevant when the recycled material is “upcycled” (substituting a high-value  
244 primary material) in the application under study, whereas it would otherwise be “downcycled”  
245 (substituting a low-value primary material) by the marginal user (see the example in the SI). In the CFF, it  
246 would be assumed that the marginal user substitutes the same primary material as the user in the  
247 foreground subsystem. Consequently, the CFF does not consider any other downstream effects that the  
248 marginal user experiences when switching back to a primary alternative instead of using the recycled  
249 material (i.e. the use of additives in the example of the SI). The lack of differentiation between the primary  
250 material in the life cycle under study and the primary material used by the marginal user of the recycled

251 material and the lack of inclusion of downstream effects are only justified in the specific situation where  
252 the life cycle under study represents the marginal user of the recycled material.

### 253 3.4.2. *Factor A and Factor B*

254 The A-factor of the CFF represents, similar to the A-factors of the market-driven substitution method, the  
255 market situation of the recycled material. However, there are differences between the CFF and the  
256 market-driven substitution method in how A is determined and what consequences are considered to take  
257 place, depending on the market-situation of a recycled material.

258 In the CFF, if there is a low offer of the recycled material and a high demand,  $A_{CFF} = 0.2$ . If there is a high  
259 offer of the recycled material and a low demand,  $A_{CFF} = 0.8$ .  $A_{CFF}$  can never have a value of 0 or 1, hence,  
260 full substitution is never an option. The European Commission provides a list of A-values for different  
261 materials, such as metals, paper, plastics, glass and wood, which is established and updated by the  
262 European Commission (European Commission, 2018). Freedom to determine A based on the context at  
263 hand could be preferable as different material grades, locations or contexts could provide different  
264 demand constraints. Besides, this could allow for the modeling of full substitution by enabling values of 0  
265 and 1. Moreover, the CFF does not distinguish between demand constraints of the consumed recycled  
266 material and demand constraints of the produced recycled material, while two separate terms for this  
267 exist in the CLCA method. As shown in the example of the SI for CLCA, the consumed recycled materials  
268 do not necessarily have the same market situation as the supplied recycled materials, which is especially  
269 relevant in the case of open-loop recycling.

270 Regarding the consequences that are modeled via Factor A, the CFF considers that the demand for a  
271 recycled material might be low, and that the additional demand or the additional supply for a recycled  
272 material with low demand leads to additional or decreased recycling of this material, respectively.  
273 However, the CFF does not consider that this additional or decreased recycling could lead, in turn, to

274 avoided or increased waste treatment, respectively, while this consequence is included in the market-  
275 driven substitution method.

276 Energy recovery is not represented by an *A*-factor, but instead by a Factor *B*. In contrast to the input of  
277 recycled material, the input of recovered energy is not included in the formula. This is not necessarily a  
278 problem, as the default value for *B* for recovered energy is 0. However, if this value would be different,  
279 the use of recovered energy should be modeled as well, similar to the recycled content of materials. The  
280 equation of the CFF does not include a term for this.

### 281 3.4.3. Quality correction

282 The CFF integrates quality ratios for the recycled content and the end-of-life recycling rate. This quality  
283 ratio of the CFF is determined by the price ratio of the secondary compared to the primary material. The  
284 market-driven substitution method does not model the relative quality of the recycled material. Instead,  
285 a factor is included that reflects the *quantity* of the primary material that is displaced by the recycled  
286 material. The price ratio as used in the CFF could give a misinformed view on the relative quality of a  
287 material, because the price ratio can be based on several other considerations, such as substitution in  
288 different market segments, downstream effects, or demand constraints. The use of a physical parameter  
289 in the market-driven substitution method ensures the mass balance of the resulting inventory, which is  
290 not ensured in the CFF.

291 In the case of open loop recycling (when  $E_v \neq E_v^*$  in the CFF, or  $E_v^{\S} \neq E_v^*$  in the market-driven substitution  
292 method), the quality factor is omitted from the CFF, because the parameter  $E_v^*$  should reflect “*how much,*  
293 *how long, [and] how well*” the recycled material substitutes a primary material (European Commission,  
294 2018). However,  $E_v^*$  as defined by the CFF in Table 2 only refers to the primary materials that are  
295 substituted, and does not explicitly mention any changes during transport, the use phase, or the end-of-  
296 life disposal due to the substitution. In the market-driven substitution method, the parameter  $E_v^*$  only

297 reflects the specific inventory of the substituted primary production process. The quantity correction  
298 factor  $\left(\frac{Q^*}{Q_v^*}\right)$  represents “how much” is substituted, and an additional term for indirect downstream effects  
299  $(\Delta E_a^*)$  is included that represents “how long and how well”, including differences in other life cycle stages.  
300 The ambition to include all such effects into a single term in the CFF has as a risk that downstream effects  
301 are not systematically taken into consideration, as the LCA practitioner could be contented with the  
302 identification of a single raw material without posing further questions.

#### 303 *3.4.4. Calculation of the end-of-life recycling rate*

304 The CFF calculates the end-of-life recycling rate as the output material flow from the recycling process,  
305 and recycling inefficiencies are part of the LCI of the recycling process ( $E_{recyclingEoL}$ ). However, the  
306 expression of  $CFF_{disposal}$  (Equation E8) considers the waste treatment of recycling inefficiencies as well,  
307 which are, therefore, double counted. To illustrate this, imagine that 5 kg of plastic waste is treated by a  
308 recycling process, with the output of 3 kg of recycled plastic. The 2 kg of plastic waste generated during  
309 the recycling activity are modeled in  $E_{recyclingEoL}$ , and the recycling rate  $R_2$  is defined as 60%. Following  
310 Equation E8, final disposal is modeled for  $1-R_2$ , i.e. 40%, which reflects the same quantity of waste disposal  
311 that is already covered by  $E_{recyclingEoL}$ .

#### 312 *3.4.5. Overall assessment of the CFF*

313 The comparison between the CFF and the market-driven substitution method in Table 3 shows that,  
314 despite the large overlap between the two formulas, the CFF does not follow a full consequential method.  
315 The main difference lies in the fact that the CFF does not explicitly refer to the marginal production and  
316 treatment processes and marginal users of recycled materials. Another difference is the consideration of  
317 (avoided) waste treatment when the demand for a recycled material is constrained. This factor was  
318 included in the previous version of the CFF (the 50/50 method (European Commission, 2013)) and  
319 eliminated from the CFF to simplify the approach. Other discrepancies between the CFF and the market-

320 driven substitution method might also be the result of simplifying choices – such as the predetermined  
321 values for  $A_{CFF}$ . This paper contributes in highlighting the consequences of such simplifications and  
322 providing alternative modeling options that could be applied in sensitivity analyses.

323 As stated above, the CFF does not explicitly claim to follow a consequential modelling approach. The PEF  
324 Guide could be seen as a mix between an attributional and a consequential LCA approach (European  
325 Commission, 2013). Whether such a mix is desirable has been discussed in other papers (Schrijvers et al.,  
326 2016a). Even if a consequential approach is not pursued, the comparison of this article could inspire  
327 method developers and users to consider whether their method is in line with the objective of the method.  
328 Furthermore, a few inconsistencies were highlighted that merit being checked by the European  
329 Commission for future use of the CFF, regarding the quality correction factor and the calculation of the  
330 end-of-life recycling rate.

331

332

| # | Modeled in CLCA                                                                                                                                                               | Term CLCA                             | Term CFF                        | CFF expressed in terms of CLCA | Difference                                                                                                                                                                                       |
|---|-------------------------------------------------------------------------------------------------------------------------------------------------------------------------------|---------------------------------------|---------------------------------|--------------------------------|--------------------------------------------------------------------------------------------------------------------------------------------------------------------------------------------------|
| 1 | Production of primary materials by the marginal production process                                                                                                            | $+(1 - RC) * E_v$                     | $+(1 - R_1) * E_v$              | $+(1 - RC) * E_v$              | CFF does not specify that $E_v$ represents the marginal process                                                                                                                                  |
| 2 | Production of the demanded recycled material by the marginal valorization process, to the extent that the demand for the recycled material is constrained                     | $+RC * (1 - A^S) * E_r^S$             | $+R_1 * A_{CFF} * E_{recycled}$ | $+RC * (1 - A^S) * E_r^S$      | <ul style="list-style-type: none"> <li>- General differences regarding the factor A, see text</li> <li>- CFF does not specify that <math>E_r^S</math> represents the marginal process</li> </ul> |
| 3 | Avoided waste disposal or storage of the demanded recycled material by the marginal treatment process, to the extent that the demand for the recycled material is constrained | $-RC * (1 - A^S) * \frac{E_d^S}{C^S}$ | NA                              | <b>NA</b>                      | - Consequence not considered in the CFF                                                                                                                                                          |

|   |                                                                                                                                                                                                                           |                                                       |                                                      |                                         |                                                                                                                                                                                                                                                                                                                                                                                           |
|---|---------------------------------------------------------------------------------------------------------------------------------------------------------------------------------------------------------------------------|-------------------------------------------------------|------------------------------------------------------|-----------------------------------------|-------------------------------------------------------------------------------------------------------------------------------------------------------------------------------------------------------------------------------------------------------------------------------------------------------------------------------------------------------------------------------------------|
| 4 | <p>Avoided downstream effects for the marginal user related to the use of the demanded recycled material instead of an alternative material, to the extent that the demand for the recycled material is unconstrained</p> | $-RC * A^S * \frac{Q^S}{Q_v^S}$ $* \Delta E_\alpha^S$ | NA                                                   | NA                                      | <p>- Consequence not considered in the CFF</p>                                                                                                                                                                                                                                                                                                                                            |
| 5 | <p>Production of an alternative material for the marginal user of the demanded recycled material, to the extent that the demand for the recycled material is unconstrained.</p>                                           | $+RC * A^S * \frac{Q^S}{Q_v^S}$ $* E_v^S$             | $+R_1 * (1 - A_{CFF})$ $* \frac{Q_{Sin}}{Q_P} * E_v$ | $+RC * A^S * \frac{Q^S}{Q_v^S}$ $* E_v$ | <p>- General differences regarding the factor A, see text</p> <p>- General differences regarding the quality correction factor, see text</p> <p>- CFF does not differentiate between <math>E_v^S</math> (production of an alternative material for the marginal user of the recycled material) and <math>E_v</math> (production of a primary material for the life cycle under study)</p> |



|   |                                                                                                                                                                  |                                                        |                                     |                                                |                                                                                                                                                                                                                                                                              |
|---|------------------------------------------------------------------------------------------------------------------------------------------------------------------|--------------------------------------------------------|-------------------------------------|------------------------------------------------|------------------------------------------------------------------------------------------------------------------------------------------------------------------------------------------------------------------------------------------------------------------------------|
| 6 | Production of the supplied recycled material via the recycling process within the foreground subsystem                                                           | $+RRE_{rec} * C_{rec} * E_{r,rec}$                     | $+R_2 * E_{recyclingEoL}$           | $+RRE_{rec} * C_{rec} * E_{r,rec}$             | - No difference between CLCA and CFF.                                                                                                                                                                                                                                        |
| 7 | Avoided valorization of recycled materials by the marginal valorization process, to the extent that the demand for the supplied recycled material is constrained | $-RRE_{rec} * C_{rec} * (1 - A^*) * E_r^*$             | $-R_2 * A_{CFF} * E_{recyclingEoL}$ | $-RRE_{rec} * C_{rec} * (1 - A^*) * E_{r,rec}$ | - General differences regarding the factor A, see text<br>- CFF does not differentiate between $E_r^*$ (valorization of the recycled material via the marginal process) and $E_{r,rec}$ (valorization of the recycled material via the process in the foreground subsystem). |
| 8 | Waste disposal or storage of recycled materials from other product value chains by the marginal disposal process to the extent that the demand for the           | $+RRE_{rec} * C_{rec} * (1 - A^*) * \frac{E_d^*}{C^*}$ | NA                                  | NA                                             | - Consequence not considered in the CFF                                                                                                                                                                                                                                      |

|    |                                                                                                                                                                                                            |                                                                         |                                                            |                                                           |                                                                                                                                                                                                 |
|----|------------------------------------------------------------------------------------------------------------------------------------------------------------------------------------------------------------|-------------------------------------------------------------------------|------------------------------------------------------------|-----------------------------------------------------------|-------------------------------------------------------------------------------------------------------------------------------------------------------------------------------------------------|
|    | supplied recycled material is constrained                                                                                                                                                                  |                                                                         |                                                            |                                                           |                                                                                                                                                                                                 |
| 9  | Downstream effects for the marginal user related to the use of the supplied recycled material instead of an alternative material, to the extent that the demand for the recycled material is unconstrained | $+RRE_{rec} * C_{rec}$<br>$* A * \frac{Q^*}{Q_v} * \Delta E_{\alpha}^*$ | NA                                                         | NA                                                        | - Consequence not considered in the CFF, although certain of these factors might be covered by the term $E_v^*$ (see Section 3.4.4.)                                                            |
| 10 | Avoided production of an alternative material for the marginal user of the supplied recycled material, to the extent that the demand for this recycled material is unconstrained.                          | $-RRE_{rec} * C_{rec}$<br>$* A * \frac{Q^*}{Q_v} * E_v^*$               | $-R_2 * (1 - A_{CFF})$<br>$* \frac{Q_{Sout}}{Q_P} * E_v^*$ | $-RRE_{rec} * C_{rec}$<br>$* A * \frac{Q^*}{Q_v} * E_v^*$ | <ul style="list-style-type: none"> <li>- General considerations regarding the factor A, see text</li> <li>- General considerations regarding the quality correction factor, see text</li> </ul> |

|    |                                                                                                                                                                                                                                                                                  |                                       |                                                              |                                       |                                                                                                                                                                                                                                                                                                                                  |
|----|----------------------------------------------------------------------------------------------------------------------------------------------------------------------------------------------------------------------------------------------------------------------------------|---------------------------------------|--------------------------------------------------------------|---------------------------------------|----------------------------------------------------------------------------------------------------------------------------------------------------------------------------------------------------------------------------------------------------------------------------------------------------------------------------------|
| 11 | <p>Incineration process within the foreground subsystem</p>                                                                                                                                                                                                                      | $+RRE_{inc}$<br>$* E_{RRE,inc}$       | $+(1 - B) * R_3$<br>$* E_{ER}$                               | $+RRE_{inc}$<br>$* E_{RRE,inc}$       | <p>- The extent to which incineration is modeled in the CFF depends on the factor <math>B</math>. The default value for <math>B</math> is 0, resulting in modeling of the same LCI in CLCA and CFF. If a different value for <math>B</math> would be authorized, the CFF would decrease the LCI of the incineration process.</p> |
| 12 | <p>Avoided production of conventional electricity by the marginal production process</p> <p><i>Key assumptions:</i></p> <ul style="list-style-type: none"> <li>- Demand for electricity is unconstrained</li> <li>- No indirect effects take place by using recovered</li> </ul> | $- RRE_{inc} * C_{elec}$<br>$* E_v^*$ | $-(1 - B) * R_3$<br>$* LHV * X_{ER,elec}$<br>$* E_{SE,elec}$ | $- RRE_{inc} * C_{elec}$<br>$* E_v^*$ | <p>- The extent to which incineration is modeled in the CFF depends on the factor <math>B</math>. The default value for <math>B</math> is 0, resulting in modeling of the same LCI in CLCA and CFF. This corresponds to the key assumption that the demand for electricity is unconstrained.</p>                                 |

|    |                                                                                                                                                                           |                                      |                          |                                                |                                                                                                                                                                                                                                                                                                                                                                                                 |
|----|---------------------------------------------------------------------------------------------------------------------------------------------------------------------------|--------------------------------------|--------------------------|------------------------------------------------|-------------------------------------------------------------------------------------------------------------------------------------------------------------------------------------------------------------------------------------------------------------------------------------------------------------------------------------------------------------------------------------------------|
|    | <p>instead of conventional electricity</p> <ul style="list-style-type: none"> <li>- 1 MJ of recovered electricity substitutes 1 MJ of conventional electricity</li> </ul> |                                      |                          |                                                | <ul style="list-style-type: none"> <li>- CFF does not specify the other key assumptions, which is, in the case of recovered energy, acceptable</li> <li>- CFF contains a specific term for recovered heat. As heat and electricity are modeled in the same way in CLCA, heat is not separately specified in the market-driven substitution method</li> </ul>                                    |
| 13 | Waste disposal process within the foreground subsystem                                                                                                                    | $+(1 - RRE_{rec} - RRE_{inc}) * E_d$ | $+(1 - R_2 - R_3) * E_d$ | $+(1 - RRE_{rec} * C_{rec} - RRE_{inc}) * E_d$ | <ul style="list-style-type: none"> <li>- In the CFF, <math>R_2</math> is measured at the output of the recycling process, while in CLCA, <math>RRE_{rec}</math> represents the input flow of the recycling process. The definition of <math>R_2</math> in the CFF suggests that waste disposal is calculated for both the share of the material that is not recycled, as well as for</li> </ul> |

|  |  |  |  |  |                                                                                                                                                                       |
|--|--|--|--|--|-----------------------------------------------------------------------------------------------------------------------------------------------------------------------|
|  |  |  |  |  | <p>inefficiencies of the recycling process.</p> <p>Recycling inefficiencies are also included in <math>E_{recyclingEoL}</math>, and are therefore double counted.</p> |
|--|--|--|--|--|-----------------------------------------------------------------------------------------------------------------------------------------------------------------------|

334

335

#### 336 4. Conclusions and perspectives

337 The recently presented Circular Footprint Formula (European Commission, 2018) has been developed to  
338 model recycling in LCA in order to make Product Environmental Footprints comparable. The CFF integrates  
339 the criticism that was raised after presenting the 50/50 method in the first version of the Product  
340 Environmental Footprint Guide (European Commission, 2013), such as the consideration of the market  
341 situation of recycled materials. As the CFF models recycling by substitution, a modeling technique that is  
342 often associated with consequential LCA, in this paper the question is raised to what extent the CFF is in  
343 line with a consequential approach. In order to investigate this, the effects that are generally modeled in  
344 a consequential LCA (CLCA) are expressed in the form of a formula, comparable to the CFF.

345 In the process of establishing this formula for CLCA, the causal relationships that are modeled in a CLCA  
346 have been visually presented in the form of a Causal Loop Diagram. This demonstrates the added value of  
347 the CLCA, as it stimulates the development of a complete LCI without imposing *ex ante* cut-off criteria of  
348 potential consequences. The CLD that is presented in this paper can be used as a tool to identify the  
349 consequences of a changing demand for a product.

350 The differences between the market-driven substitution method and the CFF of the European Commission  
351 demonstrate that the CFF has the potential to, but at the moment does not provide a full consequential  
352 approach. Main discrepancies between the CFF and the market-driven substitution method are 1) the lack  
353 of differentiation between the marginal supplier and marginal user of materials on the one hand, and the  
354 specific value chain of the life cycle under study on the other hand, 2) predetermined limitations to the  
355 extent that substitution can be modeled, and 3) an incomplete modeling of the effects of recycling when  
356 demand is constrained. Furthermore, combining several effects into a single parameter, such as a single  
357 market parameter for both the recycled content and the end-of-life recycling rate, the unclear  
358 differentiation between the material entering and exiting a recycling process, and lumping together the

359 LCI of the substituted primary material, quality correction, and other indirect effects could result in  
360 misinterpretations and a lack of transparency of the modeled substitutions.

361 These missing specifications, lacking or predetermined parameters, and lack of freedom to interpret the  
362 method to the context at hand, imply that the outcome of the CFF can be significantly different than the  
363 outcome of the CLCA approach, depending on the experience and rigor of the LCA practitioner. However,  
364 the CFF is an improvement compared to the End-of-Life formula of the PEF Guide (European Commission  
365 2013) due to a consideration of the recycled material markets (Schrijvers et al., 2016a). Further  
366 improvement of the CFF could be achieved by explicitly integrating the differences that are highlighted in  
367 this paper, so that the consequences of using or producing a recycled material are more systematically  
368 assessed. Such guidance should not be integrated in industry-specific PEFCRs, but rather in an overarching  
369 PEF document, as open-loop recycling could lead to material and energy exchanges among different  
370 industries. Integrating the suggested improvements would contribute to the harmonization of the  
371 application of substitution and the comparability of products assessed according to the PEF Guide.

## 372 [Supporting Information](#)

373 The Supporting Information contains an illustrative example to demonstrate the link between the Causal  
374 Loop Diagram and the market-driven substitution method.

## 375 [Acknowledgments](#)

376 This work has been funded by Solvay Group and the French National Association for Technical Research  
377 (CIFRE Convention N°2013/1146). The Solvay Research & Innovation team “Eco-design, Modeling &  
378 Simulation” supported this work, which was greatly appreciated by the authors. The authors would like  
379 to thank in particular Jean-François Viot and Françoise Lartigue-Peyrou for their contributions to the  
380 manuscript. Furthermore, we thank the three anonymous reviewers for their constructive feedback,  
381 which allowed us to improve the paper.

382 Disclosure

383 The authors declare no competing financial interest.

384 References

385 Consequential-LCA, 2015. When all co-products have alternatives. Last updated: 2015-10-27. [WWW  
386 Document]. URL [www.consequential-lca.org](http://www.consequential-lca.org) (accessed 11.27.16).

387 Ekvall, T., Weidema, B.P., 2004. System boundaries and input data in consequential life cycle inventory  
388 analysis. *Int J LCA* 9, 161–171. <https://doi.org/10.1007/BF02994190>

389 Eurofer, Eurometaux, European Aluminum Association, 2013. Ferrous and non-ferrous metals comments  
390 on the PEF methodology. Brussels, Belgium.

391 European Commission, 2018. PEFCR Guidance document, - Guidance for the development of Product  
392 Environmental Footprint Category Rules (PEFCRs).

393 European Commission, 2013. Product Environmental Footprint (PEF) Guide. *Oj L* 124, 1–210.

394 Finkbeiner, M., 2013. Product environmental footprint—breakthrough or breakdown for policy  
395 implementation of life cycle assessment? *Int J LCA* 19, 266–271. [https://doi.org/10.1007/s11367-](https://doi.org/10.1007/s11367-013-0678-x)  
396 [013-0678-x](https://doi.org/10.1007/s11367-013-0678-x)

397 Laurent, A., Bakas, I., Clavreul, J., Bernstad, A., Niero, M., Gentil, E., Hauschild, M.Z., Christensen, T.H.,  
398 2014. Review of LCA studies of solid waste management systems--part I: lessons learned and  
399 perspectives. *Waste Manag* 34, 573–88. <https://doi.org/10.1016/j.wasman.2013.10.045>

400 Merrild, H., Damgaard, A., Christensen, T.H., 2008. Life cycle assessment of waste paper management:  
401 The importance of technology data and system boundaries in assessing recycling and incineration.  
402 *Resour Conserv Recycl* 52, 1391–1398. <https://doi.org/10.1016/j.resconrec.2008.08.004>



403 Schrijvers, D.L., Loubet, P., Sonnemann, G., 2016a. Critical review of guidelines against a systematic  
404 framework with regard to consistency on allocation procedures for recycling in LCA. *Int. J. Life Cycle*  
405 *Assess.* 21, 994–1008. <https://doi.org/10.1007/s11367-016-1069-x>

406 Schrijvers, D.L., Loubet, P., Sonnemann, G., 2016b. Developing a systematic framework for consistent  
407 allocation in LCA. *Int. J. Life Cycle Assess.* 21, 976–993. <https://doi.org/10.1007/s11367-016-1063-3>

408 Weidema, B.P., Bauer, C., Hischer, R., Mutel, C., Nemecek, T., Reinhard, J., Vadenbo, C.O., Wernet, G.,  
409 2013. Overview and methodology - Data quality guideline for the ecoinvent database version 3.  
410 Ecoinvent Report 1 (v3). St. Gallen: The ecoinvent Centre.

411 Weidema, B.P., Ekvall, T., Heijungs, R., 2009. Guidelines for application of deepened and broadened LCA -  
412 Deliverable D18 of work package 5 of the CALCAS project. ENEA, Italy.

413 Zampori, L., Pant, R., Schau, E.M., De Schrijver, A., Galatola, M., 2016. Circular Footprint Formula.

414 Zink, T., Geyer, R., Startz, R., 2016. A Market-Based Framework for Quantifying Displaced Production  
415 from Recycling or Reuse. *J. Ind. Ecol.* 20, 719–729. <https://doi.org/10.1111/jiec.12317>

416

417
