# Supplementary material for: Carbon footprint of plastic from biomass and recycled feedstock: methodological insights
Source: Springer Nature journal article supplement (doi:10.1007/s11367-020-01853-2), 2021-01-21
Supplement: MOESM2 [file 18789060]

# Electronic Supplementary Material (ESM)

## Carbon footprint of plastic from biomass and recycled feedstock: Methodological insights

*The International Journal of Life Cycle Assessment*

Davide Tonini<sup>1\*</sup>, Dieuwertje Schrijvers<sup>2</sup>, Simone Nessi<sup>1</sup>, Pelayo Garcia-Gutierrez<sup>1</sup>, Jacopo Giuntoli<sup>1</sup>

<sup>1</sup>European Commission Joint Research Centre

<sup>2</sup>Univ. Bordeaux, CNRS, Bordeaux INP, ISM, UMR 5255, F-33400, Talence, France

<sup>1\*</sup>Corresponding author

davide.tonini@ec.europa.eu

European Commission Joint Research Centre, Calle Inca Garcilaso, 41092, Sevilla, Spain

This ESM document provides details on i) the life cycle inventories and ii) the methodology for dynamic modelling of biogenic and fossil carbon emissions, as applied in the study.

## Contents

|                                                                                |     |
|--------------------------------------------------------------------------------|-----|
| 1. Life Cycle inventory.....                                                   | S3  |
| 1.1 Rigid packaging.....                                                       | S3  |
| 1.2 Rigid panels for automotive sector.....                                    | S15 |
| 2. Dynamic (t-dependent) modelling of biogenic-C cycle .....                   | S24 |
| 2.1 Emission profiles for biogenic-C ( $z(t)$ ) .....                          | S24 |
| 2.2 Biomass growth ( $z_{\text{growth}}(t)$ ).....                             | S25 |
| 2.3 CO <sub>2</sub> emission curves / EoL curves ( $z_{\text{EoL}}(t)$ ) ..... | S26 |
| 2.4 Cumulative Radiative Forcing curves .....                                  | S26 |
| 2.5 GWP <sub>bio</sub> factors.....                                            | S29 |
| References.....                                                                | S32 |

# 1. Life Cycle inventory

## 1.1 Rigid packaging

Table S1. List of processes included in the LCI model of high-density polyethylene (HDPE) bottles and respective quantities (for a reference flow of 1 kg of product post-manufacture). EF: Pool of Environmental Footprint-compliant datasets; EI: Ecoinvent; Lit: dataset built from literature; TS: Thinkstep. The End-of-Life illustrated herein is the average EU End-of-Life treatment mix used in the default scenario calculation.

| Life Cycle Stage                 | Process                                                                                                                                                                                                                                         | Dataset                                                                                                                                                                                                                                       | Source | Quantity | Unit                                                                                                                                                                                                                                                                                                         | Comments                                                                                                                                                                       |
|----------------------------------|-------------------------------------------------------------------------------------------------------------------------------------------------------------------------------------------------------------------------------------------------|-----------------------------------------------------------------------------------------------------------------------------------------------------------------------------------------------------------------------------------------------|--------|----------|--------------------------------------------------------------------------------------------------------------------------------------------------------------------------------------------------------------------------------------------------------------------------------------------------------------|--------------------------------------------------------------------------------------------------------------------------------------------------------------------------------|
| Feedstock supply                 | Crude oil extraction and transport                                                                                                                                                                                                              | [EU-27] Crude oil mix; technology mix of conventional (primary, secondary and tertiary production) and unconventional production (oil sands, in-situ)   consumption mix, to consumer {03bcbe8f-b957-43dc-9c9e-020836c954a6}                   | EF     | 0.876    | kg                                                                                                                                                                                                                                                                                                           | As input to Naphtha production (oil refining)<br>1.08 kg crude oil / kg naphtha                                                                                                |
|                                  | Natural gas extraction and transport                                                                                                                                                                                                            | [EU-27] Natural gas mix; technology mix   consumption mix, to consumer   medium pressure level (< 1 bar) {8ede8686-62d3-46d6-9ce6-59476542bdb0}                                                                                               | EF     | 0.0173   | kg                                                                                                                                                                                                                                                                                                           | As input to Naphtha production (oil refining)<br>0.0213 kg natural gas / kg naphtha                                                                                            |
|                                  |                                                                                                                                                                                                                                                 |                                                                                                                                                                                                                                               |        | 0.276    | kg                                                                                                                                                                                                                                                                                                           | As input to Ethylene production (naphtha cracking)<br>0.276 kg natural gas / kg HDPE                                                                                           |
|                                  | Oil refining (naphtha production)                                                                                                                                                                                                               | [EU-28] Naphtha at refinery - open flows crude oil, natural gas; from crude oil   production mix, at refinery   44 MJ/ kg net calorific value {914dfb2a-bc7b-4829-942f-c3089fb10de8}                                                          | TS     | 0.811    | kg                                                                                                                                                                                                                                                                                                           | As input to Ethylene production<br>0.81 kg naphtha / kg HDPE                                                                                                                   |
| Transport of naphtha to cracking | [EU-28] Naphtha transport to industrial user, via pipeline<br>Based on transport-related burdens in the ecoinvent dataset "[RER] market for naphtha {b1561c62-5141-4469-82bb-65a2f6287017}", with the adjustments reported in the comment field | EI + EF                                                                                                                                                                                                                                       | 0.811  | kg       | The original ecoinvent dataset was adjusted as follows:<br>-Transport by rail, road and barge were converted to onshore pipeline transport<br>- The electricity input was modelled via EF datasets<br>- Geography of sub-processes was changed to reflect European background conditions (where appropriate) |                                                                                                                                                                                |
| Polymer production               | Cracking (ethylene production), polymerisation                                                                                                                                                                                                  | [EU-28] Polyethylene high density granulate (HDPE/PE-HD) - open flows naphtha, natural gas; polymerisation of ethylene   production mix, at plant   0.91- 0.96 g/cm3, 28 g/mol per repeating unit {acf2a034-3564-47ad-8953-6dd344f7aa4d}      | TS     | 1.001    | kg                                                                                                                                                                                                                                                                                                           | Black-box dataset covering all supply-chain processes from naphtha/feedstock conversion to polymerisation<br>Process quantity accounts for 0.1% losses at the production stage |
|                                  | Transport of polymer granulate to article production site (from supplier to factory) - EU production (78%)                                                                                                                                      | [EU-28+3] Articulated lorry transport, Euro 4, Total weight >32 t (without fuel); diesel driven, Euro 4, cargo   consumption mix, to consumer   more than 32t gross weight / 24,7t payload capacity {938d5ba6-17e4-4f0d-bef0-481608681f57}    | EF     | 102      | kg*km                                                                                                                                                                                                                                                                                                        | 130 km by truck (>32 t, EURO 4, default utilisation ratio)                                                                                                                     |
|                                  |                                                                                                                                                                                                                                                 | [EU-28+3] Freight train, average (without fuel); technology mix, electricity and diesel driven, cargo   consumption mix, to consumer   average train, gross tonne weight 1000t / 726t payload capacity {02e87631-6d70-48ce-affd-1975dc36f5be} | EF     | 187      | kg*km                                                                                                                                                                                                                                                                                                        | 240 km by train (average freight train)                                                                                                                                        |

|                                                                                                                  |                                                 |                                                                                                                                                                                                                                                                                                                                                                                            |                                                                                                                                                                                                                                            |          |       |                                                                                                                                                                                                                 |                                                                                                            |
|------------------------------------------------------------------------------------------------------------------|-------------------------------------------------|--------------------------------------------------------------------------------------------------------------------------------------------------------------------------------------------------------------------------------------------------------------------------------------------------------------------------------------------------------------------------------------------|--------------------------------------------------------------------------------------------------------------------------------------------------------------------------------------------------------------------------------------------|----------|-------|-----------------------------------------------------------------------------------------------------------------------------------------------------------------------------------------------------------------|------------------------------------------------------------------------------------------------------------|
|                                                                                                                  |                                                 | [EU-28+3] Barge; technology mix, diesel driven, cargo / consumption mix, to consumer   1500 t payload capacity {4cfacea0-cce4-4b4d-bd2b-223c8d4c90ae}                                                                                                                                                                                                                                      | EF                                                                                                                                                                                                                                         | 211      | kg*km | 270 km by ship (barge)                                                                                                                                                                                          |                                                                                                            |
| Transport of polymer granulate to article production site (from supplier to factory) - Extra-EU production (22%) |                                                 | [ROW: w/o EU-28+3] Articulated lorry transport, Total weight >32 t, mix Euro 0-5, diesel driven, Euro 0 - 5 mix, cargo / consumption mix, to consumer   more than 32t gross weight / 24,7t payload {794afe57-dca3-462c-8988-8f1790dfd8b2}                                                                                                                                                  | EF                                                                                                                                                                                                                                         | 220      | kg*km | 1000 km by truck (>32 t, EURO 4, default utilisation ratio), for the sum of distances from harbour/airport to factory outside of Europe                                                                         |                                                                                                            |
|                                                                                                                  |                                                 | [GLO] Transoceanic ship, containers; heavy fuel oil driven, cargo / consumption mix, to consumer   27.500 dwt payload capacity, ocean going {6ca61112-1d5b-473c-abfa-4acc66a8a63}                                                                                                                                                                                                          | EF                                                                                                                                                                                                                                         | 1430     | kg*km | Based on an overall weighted average sea distance between importing countries and EU equal to 7,982 km                                                                                                          |                                                                                                            |
|                                                                                                                  |                                                 | [EU-28+3] Articulated lorry transport, Euro 4, Total weight >32 t (without fuel); diesel driven, Euro 4, cargo / consumption mix, to consumer   more than 32t gross weight / 24,7t payload capacity {938d5ba6-17e4-4f0d-bef0-481608681f57}                                                                                                                                                 | EF                                                                                                                                                                                                                                         | 220      | kg*km | 1000 km by truck (>32 t, EURO 4, default utilisation ratio), for the sum of distances from harbour/airport to factory inside of Europe                                                                          |                                                                                                            |
|                                                                                                                  |                                                 |                                                                                                                                                                                                                                                                                                                                                                                            |                                                                                                                                                                                                                                            |          |       |                                                                                                                                                                                                                 |                                                                                                            |
| Product manufacturing (incl. distribution)                                                                       | (Extrusion) blow moulding                       | [EU-28+EFTA] Blow moulding; blow moulding   production mix, at plant   PET, HDPE and PP {215dd4d8-52ad-4eee-bd63-7a6193f2b8d5}                                                                                                                                                                                                                                                             | EF                                                                                                                                                                                                                                         | 1.001    | kg    | Approximates "extrusion blow moulding" used for HDPE bottles (99.9 % efficiency, i.e. 0.1% losses)                                                                                                              |                                                                                                            |
|                                                                                                                  | Recycling of loss from blow moulding            | [EU-28] Polyethylene, high-density, granulate, secondary, from post-consumer plastic waste<br>Based on the ecoinvent dataset "[Europe without Switzerland] Polyethylene production, high density, granulate, recycled" updated with data in the latest Franklin Associates (2018) report, and replacing background datasets with EF datasets                                               | Lit. + EF                                                                                                                                                                                                                                  | 0.000420 | kg    | $\eta = 84\%$ (recycling efficiency)                                                                                                                                                                            |                                                                                                            |
|                                                                                                                  | Avoided virgin HDPE production                  | [EU-28] Polyethylene high density granulate (HDPE/PE-HD); polymerisation of fossil-based ethylene   production mix, at plant<br>Cradle-to-gate dataset based on EF datasets for crude oil/natural gas supply, and TS datasets for refining and downstream conversion and polymerisation (black-box) as better detailed above for the stages of "Feedstock supply" and "Polymer production" | TS + EF                                                                                                                                                                                                                                    | 0.000353 | kg    | Replacement of fossil-based HDPE only is assumed (the estimated market share of bio-based HDPE is negligible, i.e. 0.2%).<br>We assumed that recycled HDPE only replaces EU domestically produced virgin resin. |                                                                                                            |
|                                                                                                                  | Transport of bottles from factory to final user |                                                                                                                                                                                                                                                                                                                                                                                            | [EU-28+3] Articulated lorry transport, Euro 4, Total weight >32 t (without fuel); diesel driven, Euro 4, cargo / consumption mix, to consumer   more than 32t gross weight / 24,7t payload capacity {938d5ba6-17e4-4f0d-bef0-481608681f57} | EF       | 1200  | kg*km                                                                                                                                                                                                           | From factory to retail<br>Local supply chain: 1'200 km by truck (>32 t, EURO 4, default utilisation ratio) |
|                                                                                                                  |                                                 |                                                                                                                                                                                                                                                                                                                                                                                            | [GLO] Passenger car, average; technology mix, gasoline and diesel driven, Euro 3-5, passenger car   consumption mix, to consumer   engine size from 1,4l up to >2l {1ead35dd-fc71-4b0c-9410-7e39da95c7dc}                                  | EF       | 3.10  | km                                                                                                                                                                                                              | From retail to final client:<br>62% by car - 5 km (passenger car, average, default allocation)             |
|                                                                                                                  |                                                 | [EU-28+3] Articulated lorry transport, Euro 3, Total weight <7.5 t (without fuel) diesel driven, Euro 3, cargo / consumption mix, to consumer   up to 7,5t gross weight / 3,3t payload capacity {aea613ae-573b-443a-aba2-6a69900ca2ff}                                                                                                                                                     | EF                                                                                                                                                                                                                                         | 0.250    | kg*km | From retail to final client:<br>5% by delivery van – 5 km round trip (lorry <7.5t, EURO 3, with utilisation ratio of 20%)                                                                                       |                                                                                                            |

|             |                                |                                                                                                                                                                                                                                                                                                                                                                                                   |           |       |    |                                                                                                                                                                                                                                |
|-------------|--------------------------------|---------------------------------------------------------------------------------------------------------------------------------------------------------------------------------------------------------------------------------------------------------------------------------------------------------------------------------------------------------------------------------------------------|-----------|-------|----|--------------------------------------------------------------------------------------------------------------------------------------------------------------------------------------------------------------------------------|
| End-of-Life | Recycling (64%)                | <i>[EU-28] Plastic waste collection for recycling</i><br>Developed based on data from Rigamonti et al. (2013) and EF background datasets                                                                                                                                                                                                                                                          | Lit. + EF | 0.320 | kg | R2 = 64%<br>η = 84% (recycling efficiency)                                                                                                                                                                                     |
|             |                                | <i>[EU-28] Plastic waste sorting at MRF</i><br>Developed based on foreground LCI data from Franklin Associates (2018) and background EF datasets                                                                                                                                                                                                                                                  | Lit. + EF | 0.320 | kg |                                                                                                                                                                                                                                |
|             |                                | <i>[EU-28] Polyethylene, high-density, granulate, secondary, from post-consumer plastic waste</i><br>Based on the ecoinvent dataset " <i>[Europe without Switzerland] Polyethylene production, high density, granulate, recycled</i> " updated with data in the latest Franklin Associates (2018) report, and replacing background datasets with EF datasets                                      | Lit. + EF | 0.269 | kg |                                                                                                                                                                                                                                |
|             | Avoided virgin HDPE production | <i>[EU-28] Polyethylene high density granulate (HDPE/PE-HD); polymerisation of fossil-based ethylene   production mix, at plant</i><br>Cradle-to-gate dataset based on EF datasets for crude oil/natural gas supply, and TS datasets for refining and downstream conversion and polymerisation (black-box) as better detailed above for the stages of "Feedstock supply" and "Polymer production" | TS + EF   | 0.242 | kg | Qs/Qp = 0.9<br>Replacement of fossil-based HDPE only is assumed (the estimated market share of bio-based HDPE is negligible, i.e. 0.2%).<br>We assumed that recycled HDPE only replaces EU domestically produced virgin resin. |
|             | Incineration (19%)             | <i>[EU-28] Plastic waste collection, as residual waste</i><br>Developed based on data from Rigamonti et al. (2013) and EF background datasets                                                                                                                                                                                                                                                     | Lit. + EF | 0.190 | kg | R3 = 19%                                                                                                                                                                                                                       |
|             |                                | <i>[EU-28+EFTA] Waste incineration of PE; waste-to-energy plant with dry flue gas treatment, including transport and pre-treatment   production mix, at consumer   polyethylene waste {0370baaf-8923-4e26-b3b8-abcebb89f974}</i>                                                                                                                                                                  | EF        | 0.190 | kg |                                                                                                                                                                                                                                |
|             | Landfilling (17%)              | <i>[EU-28] Plastic waste collection, as residual waste</i><br>Developed based on data from Rigamonti et al. (2013) and EF background datasets                                                                                                                                                                                                                                                     | Lit. + EF | 0.170 | kg | (1-R2-R3)=17%                                                                                                                                                                                                                  |
|             |                                | <i>[EU-28+EFTA] Landfill of plastic waste; landfill including leachate treatment and with transport without collection and pre-treatment   production mix (region specific sites), / The carbon and water content are respectively of 62%C and 0% Water (in weight %) {f2bea0f5-e4b7-4a2c-9f34-4eb32495cbc6}</i>                                                                                  | EF        | 0.170 | kg |                                                                                                                                                                                                                                |

Table S2. List of processes included in the LCI model of recycled high-density polyethylene (R-HDPE) bottles and respective quantities (for a reference flow of 1 kg of product post-manufacture). EF: Pool of Environmental Footprint-compliant datasets; EI: Ecoinvent; Lit: dataset built from literature; TS: Thinkstep. The End-of-Life illustrated herein is the average EU End-of-Life treatment mix used in the default scenario calculation.

| Life Cycle Stage                                                                                                                                      | Process                                                                              | Dataset                                                                                                                                                                                                                                                                                                                                      | Source    | Quantity | Unit                   | Comments                                                                                                                                                                                                      |
|-------------------------------------------------------------------------------------------------------------------------------------------------------|--------------------------------------------------------------------------------------|----------------------------------------------------------------------------------------------------------------------------------------------------------------------------------------------------------------------------------------------------------------------------------------------------------------------------------------------|-----------|----------|------------------------|---------------------------------------------------------------------------------------------------------------------------------------------------------------------------------------------------------------|
| Feedstock supply (recycled)                                                                                                                           | Plastic waste collection                                                             | [EU-28] Plastic waste collection for recycling<br>Developed based on data in Rigamonti et al. (2013) and EF background datasets                                                                                                                                                                                                              | Lit. + EF | 0.608    | kg                     | Process quantity accounts for 82.3% recycling efficiency and 0.1% losses at the production stage                                                                                                              |
|                                                                                                                                                       | Plastic waste sorting                                                                | [EU-28] Plastic waste sorting at MRF<br>Developed based on foreground LCI data from Franklin Associates (2018) and background EF datasets                                                                                                                                                                                                    | Lit. + EF | 0.608    | kg                     |                                                                                                                                                                                                               |
| Polymer production                                                                                                                                    | Secondary, bottle-grade HDPE production                                              | [EU-28] Polyethylene, high density (HDPE), granulate, bottle grade, secondary; from post-consumer plastic waste<br>Developed based on the ecoinvent dataset "CH polyethylene terephthalate production, granulate, bottle grade, recycled", adapted to EU conditions and replacing background energy datasets with EF datasets                | EI + EF   | 0.501    | kg                     | The recycling process for bottle-grade PET is used as an approximation also for bottle-grade HDPE (in the absence of more specific data)<br>Process quantity accounts for 0.1% losses at the production stage |
|                                                                                                                                                       | Virgin HDPE production (Cracking (ethylene production), polymerisation)              | [EU-28] Polyethylene high density granulate (HDPE/PE-HD) - open flows naphtha, natural gas; polymerisation of ethylene / production mix, at plant   0.91- 0.96 g/cm3, 28 g/mol per repeating unit {acf2a034-3564-47ad-8953-6dd344f7aa4d}                                                                                                     | TS        | 0.501    | kg                     | Black-box dataset covering all supply-chain processes from naphtha/feedstock conversion to polymerisation<br>Process quantity accounts for 0.1% losses at the production stage                                |
|                                                                                                                                                       | Transport of polymer granulate to article production site (from supplier to factory) | [EU-28+3] Articulated lorry transport, Euro 4, Total weight >32 t (without fuel); diesel driven, Euro 4, cargo   consumption mix, to consumer   more than 32t gross weight / 24.7t payload capacity {938d5ba6-17e4-4f0d-bef0-481608681f57}                                                                                                   | EF        | 130      | kg*km                  | 130 km by truck (>32 t, EURO 4, default utilisation ratio)                                                                                                                                                    |
|                                                                                                                                                       |                                                                                      | [EU-28+3] Freight train, average (without fuel); technology mix, electricity and diesel driven, cargo   consumption mix, to consumer   average train, gross tonne weight 1000t / 726t payload capacity {02e87631-6d70-48ce-affd-1975dc36f5be}                                                                                                | EF        | 240      | kg*km                  | 240 km by train (average freight train)                                                                                                                                                                       |
| [EU-28+3] Barge; technology mix, diesel driven, cargo   consumption mix, to consumer   1500 t payload capacity {4cfacea0-cce4-4b4d-bd2b-223c8d4c90ae} |                                                                                      | EF                                                                                                                                                                                                                                                                                                                                           | 270       | kg*km    | 270 km by ship (barge) |                                                                                                                                                                                                               |
| Product manufacturing (incl. distribution)                                                                                                            | (Extrusion) blow moulding                                                            | [EU-28+EFTA] Blow moulding; blow moulding   production mix, at plant   PET, HDPE and PP {215dd4d8-52ad-4eee-bd63-7a6193f2b8d5}                                                                                                                                                                                                               | EF        | 1.0      | kg                     | Approximates "extrusion blow moulding" used for HDPE bottles (99.9 % efficiency, i.e. 0.1% losses)                                                                                                            |
|                                                                                                                                                       | Recycling of loss from blow moulding                                                 | [EU-28] Polyethylene, high-density, granulate, secondary, from post-consumer plastic waste<br>Based on the ecoinvent dataset "[Europe without Switzerland] Polyethylene production, high density, granulate, recycled" updated with data in the latest Franklin Associates (2018) report, and replacing background datasets with EF datasets | Lit. + EF | 0.000420 | kg                     | $\eta = 84\%$ (recycling efficiency)                                                                                                                                                                          |

|                                                                                                                                                                                                                           |                                                 |                                                                                                                                                                                                                                                                                                                                                                                                |           |          |       |                                                                                                                                                                                                                                |
|---------------------------------------------------------------------------------------------------------------------------------------------------------------------------------------------------------------------------|-------------------------------------------------|------------------------------------------------------------------------------------------------------------------------------------------------------------------------------------------------------------------------------------------------------------------------------------------------------------------------------------------------------------------------------------------------|-----------|----------|-------|--------------------------------------------------------------------------------------------------------------------------------------------------------------------------------------------------------------------------------|
|                                                                                                                                                                                                                           | Avoided virgin HDPE production                  | [EU-28] Polyethylene high density granulate (HDPE/PE-HD); polymerisation of fossil-based ethylene   production mix, at plant Cradle-to-gate dataset based on EF datasets for crude oil/natural gas supply, and TS datasets for refining and downstream conversion and polymerisation (black-box) as better detailed above for the stages of "Virgin feedstock supply" and "Polymer production" | EF + TS   | 0.000353 | kg    | Replacement of fossil-based HDPE only is assumed (the estimated market share of bio-based HDPE is negligible, i.e. 0.2%).<br>We assumed that recycled HDPE only replaces EU domestically produced virgin resin.                |
|                                                                                                                                                                                                                           | Transport of bottles from factory to final user | [EU-28+3] Articulated lorry transport, Euro 4, Total weight >32 t (without fuel); diesel driven, Euro 4, cargo   consumption mix, to consumer   more than 32t gross weight / 24,7t payload capacity {938d5ba6-17e4-4f0d-bef0-481608681f57}                                                                                                                                                     | EF        | 1200     | kg*km | From factory to retail<br>Local supply chain: 1'200 km by truck (>32 t, EURO 4, default utilisation ratio)                                                                                                                     |
|                                                                                                                                                                                                                           |                                                 | [GLO] Passenger car, average; technology mix, gasoline and diesel driven, Euro 3-5, passenger car   consumption mix, to consumer   engine size from 1,4l up to >2l {1ead35dd-fc71-4b0c-9410-7e39da95c7dc}                                                                                                                                                                                      | EF        | 3.10     | km    | From retail to final client:<br>62% by car - 5 km (passenger car, average, default allocation)                                                                                                                                 |
|                                                                                                                                                                                                                           |                                                 | [EU-28+3] Articulated lorry transport, Euro 3, Total weight <7.5 t (without fuel) diesel driven, Euro 3, cargo   consumption mix, to consumer   up to 7,5t gross weight / 3,3t payload capacity {aea613ae-573b-443a-aba2-6a69900ca2ff}                                                                                                                                                         | EF        | 0.250    | kg*km | From retail to final client:<br>5% by delivery van – 5 km round trip (lorry <7.5t, EURO 3, with utilisation ratio of 20%)                                                                                                      |
| End-of-Life                                                                                                                                                                                                               | Recycling (64%)                                 | [EU-28] Plastic waste collection for recycling<br>Developed based on data in Rigamonti et al. (2013) and EF background datasets                                                                                                                                                                                                                                                                | Lit. + EF | 0.320    | kg    | R2 = 64%<br>η = 84% (recycling efficiency)                                                                                                                                                                                     |
|                                                                                                                                                                                                                           |                                                 | [EU-28] Plastic waste sorting at MRF<br>Developed based on foreground LCI data from Franklin Associates (2018) and background EF datasets                                                                                                                                                                                                                                                      | Lit. + EF | 0.320    | kg    |                                                                                                                                                                                                                                |
|                                                                                                                                                                                                                           |                                                 | [EU-28] Polyethylene, high-density, granulate, secondary, from post-consumer plastic waste<br>Based on theecoinvent dataset "[Europe without Switzerland] Polyethylene production, high density, granulate, recycled" updated with data in the latest Franklin Associates (2018) report, and replacing background datasets with EF datasets                                                    | Lit. + EF | 0.269    | kg    |                                                                                                                                                                                                                                |
|                                                                                                                                                                                                                           | Avoided virgin HDPE production                  | [EU-28] Polyethylene high density granulate (HDPE/PE-HD); polymerisation of fossil-based ethylene   production mix, at plant Cradle-to-gate dataset based on EF datasets for crude oil/natural gas supply, and TS datasets for refining and downstream conversion and polymerisation (black-box) as better detailed above for the stages of "Feedstock supply" and "Polymer production"        | TS + EF   | 0.242    | kg    | Qs/Qp = 0.9<br>Replacement of fossil-based HDPE only is assumed (the estimated market share of bio-based HDPE is negligible, i.e. 0.2%).<br>We assumed that recycled HDPE only replaces EU domestically produced virgin resin. |
|                                                                                                                                                                                                                           | Incineration (19%)                              | [EU-28] Plastic waste collection, as residual waste<br>Developed based on data in Rigamonti et al. (2013) and EF background datasets                                                                                                                                                                                                                                                           | Lit. + EF | 0.190    | kg    | R3 = 19%                                                                                                                                                                                                                       |
| [EU-28+EFTA] Waste incineration of PE; waste-to-energy plant with dry flue gas treatment, including transport and pre-treatment   production mix, at consumer   polyethylene waste {0370baaf-8923-4e26-b3b8-abcebb89f974} |                                                 | EF                                                                                                                                                                                                                                                                                                                                                                                             | 0.190     | kg       |       |                                                                                                                                                                                                                                |

|  |                   |                                                                                                                                                                                                                                                                                                                  |           |       |    |                 |
|--|-------------------|------------------------------------------------------------------------------------------------------------------------------------------------------------------------------------------------------------------------------------------------------------------------------------------------------------------|-----------|-------|----|-----------------|
|  | Landfilling (17%) | <i>[EU-28] Plastic waste collection, as residual waste</i><br>Developed based on data in Rigamonti et al. (2013) and EF background datasets                                                                                                                                                                      | Lit. + EF | 0.170 | kg | (1-R2-R3) = 17% |
|  |                   | <i>[EU-28+EFTA] Landfill of plastic waste; landfill including leachate treatment and with transport without collection and pre-treatment / production mix (region specific sites), / The carbon and water content are respectively of 62%C and 0% Water (in weight %) {f2bea0f5-e4b7-4a2c-9f34-4eb32495cbc6}</i> | EF        | 0.170 | kg |                 |



Table S3. List of processes included in the LCI model of bio-based high-density polyethylene (Bio-HDPE) bottles and respective quantities (for a reference flow of 1 kg of product post-manufacture). EF: Pool of Environmental Footprint-compliant datasets; EI:ecoinvent; Lit: dataset built from literature; TS: Thinkstep. The End-of-Life illustrated herein is the average EU End-of-Life treatment mix used in the default scenario calculation.

| Life Cycle Stage   | Process                                                            | Dataset                                                                                                                                                                                                                                                                                                                                                                                                    | Source         | Quantity | Unit  | Comments                                                                                                                                                                                                   |
|--------------------|--------------------------------------------------------------------|------------------------------------------------------------------------------------------------------------------------------------------------------------------------------------------------------------------------------------------------------------------------------------------------------------------------------------------------------------------------------------------------------------|----------------|----------|-------|------------------------------------------------------------------------------------------------------------------------------------------------------------------------------------------------------------|
| Feedstock supply   | Sugarcane cultivation (Brazil)                                     | [BR] Sugarcane perennial (100% slash and burn); technology mix   production mix, to consumer   74% H2O, 100% pre-harvest burning {b5b11cef-dc10-4aec-bfd8-775c4d881190}                                                                                                                                                                                                                                    | TS             | 12.9     | kg    | 45% of sugarcane harvested via pre-harvest burning of residues (top & leaves); 55% without applying any pre-burning practice                                                                               |
|                    |                                                                    | [BR] Sugarcane perennial (0% slash and burn); technology mix   production mix, to consumer   74% H2O, 0% pre-harvest burning {42013d80-2205-4882-b218-7ba02bfac157}                                                                                                                                                                                                                                        | TS             | 15.8     | kg    |                                                                                                                                                                                                            |
|                    | Transport of sugarcane to processing (fermentation & distillation) | [EU-28+3] Articulated lorry transport, Euro 4, Total weight >32 t (without fuel); diesel driven, Euro 4, cargo   consumption mix, to consumer   more than 32t gross weight / 24,7t payload capacity {938d5ba6-17e4-4f0d-bef0-481608681f57}                                                                                                                                                                 | EF             | 717      | kg*km | 25 km by truck<br>Brazilian diesel is considered as an input                                                                                                                                               |
| Polymer production | Ethanol production (Brazil)                                        | [BR] Ethanol, without water, in 95% solution state, from fermentation   ethanol production from sugarcane<br>Developed based on the ecoinvent dataset "[BR] Ethanol, without water, in 95% solution state, from fermentation   ethanol production from sugarcane", replacing allocation with "direct substitution" of surplus energy from bagasse burning, and background energy datasets with EF datasets | EI + EF        | 1.92     | kg    | 1.91 t bioethanol / t bio-ethylene<br>Calculated as the average consumption from the values reported in IEA-ETSAP & IRENA (2013; 1.74 kg ethanol/kg ethylene) and IfBB (2018; 2.08 kg ethanol/kg ethylene) |
|                    | Transport of ethanol from Brazil to EU                             | [EU-28+3] Articulated lorry transport, Euro 4, Total weight >32 t (without fuel); diesel driven, Euro 4, cargo   consumption mix, to consumer   more than 32t gross weight / 24,7t payload capacity {938d5ba6-17e4-4f0d-bef0-481608681f57}                                                                                                                                                                 | EF             | 1915.7   | kg*km | 1000 km by truck (>32 t, EURO 4, default utilisation ratio), for the sum of distances from harbour/airport to factory in Brazil<br>Brazilian diesel is considered as an input                              |
|                    |                                                                    | [GLO] Transoceanic ship, containers; heavy fuel oil driven, cargo   consumption mix, to consumer   27.500 dwt payload capacity, ocean going {6ca61112-1d5b-473c-abfa-4accc66a8a63}                                                                                                                                                                                                                         | EF             | 21648    | kg*km | 11300 km by ship (transoceanic container; Porto Alegre - Rotterdam)                                                                                                                                        |
|                    |                                                                    | [EU-28+3] Articulated lorry transport, Euro 4, Total weight >32 t (without fuel); diesel driven, Euro 4, cargo   consumption mix, to consumer   more than 32t gross weight / 24,7t payload capacity {938d5ba6-17e4-4f0d-bef0-481608681f57}                                                                                                                                                                 | EF             | 1916     | kg*km | 1000 km by truck (>32 t, EURO 4, default utilisation ratio), for the sum of distances from harbour/airport to factory inside of Europe                                                                     |
|                    | Ethylene production (EU)                                           | [EU-28] Bio-ethylene production (dehydration of bio-based ethanol)<br>Developed based on foreground literature data related to a real industrial process (ACV Brasil, 2017) and background EF and ecoinvent datasets (for energy generation and material production, respectively)                                                                                                                         | Lit. + (EF+EI) | 1.003    | kg    | 1.002 kg (bio)-ethylene / kg HDPE (PlasticsEurope ecoprofile)                                                                                                                                              |

|                                                                                                                                                                                                           |                                                                                      |                                                                                                                                                                                                                                                                                                                                                                                                                         |                          |          |                                                                                                |                                                                                                                                                                                                                                |
|-----------------------------------------------------------------------------------------------------------------------------------------------------------------------------------------------------------|--------------------------------------------------------------------------------------|-------------------------------------------------------------------------------------------------------------------------------------------------------------------------------------------------------------------------------------------------------------------------------------------------------------------------------------------------------------------------------------------------------------------------|--------------------------|----------|------------------------------------------------------------------------------------------------|--------------------------------------------------------------------------------------------------------------------------------------------------------------------------------------------------------------------------------|
|                                                                                                                                                                                                           | HDPE production (polymerisation - EU)                                                | [EU-28] High Density Polyethylene (HDPE) production, granulate<br>Based on the PlasticsEurope ecoprofile "[RER] Polyethylene production, high density, granulate" (as implemented in ecoinvent) replacing background energy datasets with EF datasets                                                                                                                                                                   | PlasticsEurope + (EI+EF) | 1.001    | kg                                                                                             | Process quantity accounts for 0.1% losses at the article production stage                                                                                                                                                      |
| Transport                                                                                                                                                                                                 | Transport of polymer granulate to article production site (from supplier to factory) | [EU-28+3] Articulated lorry transport, Euro 4, Total weight >32 t (without fuel); diesel driven, Euro 4, cargo   consumption mix, to consumer   more than 32t gross weight / 24,7t payload capacity {938d5ba6-17e4-4f0d-bef0-481608681f57}                                                                                                                                                                              | EF                       | 130      | kg*km                                                                                          | 130 km by truck (>32 t, EURO 4, default utilisation ratio)                                                                                                                                                                     |
|                                                                                                                                                                                                           |                                                                                      | [EU-28+3] Freight train, average (without fuel); technology mix, electricity and diesel driven, cargo   consumption mix, to consumer   average train, gross tonne weight 1000t / 726t payload capacity {02e87631-6d70-48ce-affd-1975dc36f5be}                                                                                                                                                                           | EF                       | 240      | kg*km                                                                                          | 240 km by train (average freight train)                                                                                                                                                                                        |
|                                                                                                                                                                                                           |                                                                                      | [EU-28+3] Barge; technology mix, diesel driven, cargo   consumption mix, to consumer   1500 t payload capacity {4cfacea0-cce4-4b4d-bd2b-223c8d4c90ae}                                                                                                                                                                                                                                                                   | EF                       | 270      | kg*km                                                                                          | 270 km by ship (barge)                                                                                                                                                                                                         |
| Product manufacturing (incl. distribution)                                                                                                                                                                | (Extrusion) blow moulding                                                            | [EU-28+EFTA] Blow moulding; blow moulding   production mix, at plant   PET, HDPE and PP {215dd4d8-52ad-4eee-bd63-7a6193f2b8d5}                                                                                                                                                                                                                                                                                          | EF                       | 1.001    | kg                                                                                             | Approximates "extrusion blow moulding" used for HDPE bottles (99.9 % efficiency, i.e. 0.1% losses)                                                                                                                             |
|                                                                                                                                                                                                           | Recycling of losses from blow moulding                                               | [EU-28] Polyethylene, high-density, granulate, secondary, from post-consumer plastic waste<br>Based on the ecoinvent dataset "[Europe without Switzerland] Polyethylene production, high density, granulate, recycled" updated with data in the latest Franklin Associates (2018) report, and replacing background datasets with EF datasets                                                                            | Lit. + EF                | 0.000420 | kg                                                                                             | $\eta = 84\%$ (recycling efficiency)                                                                                                                                                                                           |
|                                                                                                                                                                                                           | Avoided virgin HDPE production                                                       | [EU-28] Polyethylene high density granulate (HDPE/PE-HD); polymerisation of fossil-based ethylene   production mix, at plant<br>Cradle-to-gate dataset based on EF datasets for crude oil/natural gas supply, and TS datasets for refining and downstream conversion and polymerisation (black-box) as better detailed in the fossil-based HDPE LCI model for the stages of "Feedstock supply" and "Polymer production" | EF + TS                  | 0.000353 | kg                                                                                             | Qs/Qp = 0.9<br>Replacement of fossil-based HDPE only is assumed (the estimated market share of bio-based HDPE is negligible, i.e. 0.2%).<br>We assumed that recycled HDPE only replaces EU domestically produced virgin resin. |
|                                                                                                                                                                                                           | Transport of bottles from factory to final user                                      | [EU-28+3] Articulated lorry transport, Euro 4, Total weight >32 t (without fuel); diesel driven, Euro 4, cargo   consumption mix, to consumer   more than 32t gross weight / 24,7t payload capacity {938d5ba6-17e4-4f0d-bef0-481608681f57}                                                                                                                                                                              | EF                       | 1200     | kg*km                                                                                          | From factory to retail<br>Local supply chain: 1'200 km by truck (>32 t, EURO 4, default utilisation ratio)                                                                                                                     |
| [GLO] Passenger car, average; technology mix, gasoline and diesel driven, Euro 3-5, passenger car   consumption mix, to consumer   engine size from 1,4l up to >2l {1ead35dd-fc71-4b0c-9410-7e39da95c7dc} |                                                                                      | EF                                                                                                                                                                                                                                                                                                                                                                                                                      | 3.10                     | km       | From retail to final client:<br>62% by car - 5 km (passenger car, average, default allocation) |                                                                                                                                                                                                                                |

|                   |                                                                                                                                      |                                                                                                                                                                                                                                                                                                                                                                                                                         |           |       |                                                                                                         |                                                                                                                                                                                                                                |
|-------------------|--------------------------------------------------------------------------------------------------------------------------------------|-------------------------------------------------------------------------------------------------------------------------------------------------------------------------------------------------------------------------------------------------------------------------------------------------------------------------------------------------------------------------------------------------------------------------|-----------|-------|---------------------------------------------------------------------------------------------------------|--------------------------------------------------------------------------------------------------------------------------------------------------------------------------------------------------------------------------------|
|                   |                                                                                                                                      | [EU-28+3] Articulated lorry transport, Euro 3, Total weight <7.5 t (without fuel) diesel driven, Euro 3, cargo / consumption mix, to consumer   up to 7,5t gross weight / 3,3t payload capacity {aea613ae-573b-443a-aba2-6a69900ca2ff}                                                                                                                                                                                  | EF        | 0.250 | kg*km                                                                                                   | From retail to final client:<br>5% by delivery van – 5 km round trip (lorry <7.5t, EURO 3, with utilisation ratio of 20%)                                                                                                      |
| End-of-Life       | Recycling (64%)                                                                                                                      | [EU-28] Plastic waste collection for recycling<br>Developed based on data in Rigamonti et al. (2013) and EF background datasets                                                                                                                                                                                                                                                                                         | Lit. + EF | 0.320 | kg                                                                                                      | R2 = 64%<br>η = 84% (recycling efficiency)                                                                                                                                                                                     |
|                   |                                                                                                                                      | [EU-28] Plastic waste sorting at MRF<br>Developed based on foreground LCI data from Franklin Associates (2018) and background EF datasets                                                                                                                                                                                                                                                                               | Lit. + EF | 0.320 | kg                                                                                                      |                                                                                                                                                                                                                                |
|                   |                                                                                                                                      | [EU-28] Polyethylene, high-density, granulate, secondary, from post-consumer plastic waste<br>Based on the ecoinvent dataset "[Europe without Switzerland] Polyethylene production, high density, granulate, recycled" updated with data in the latest Franklin Associates (2018) report, and replacing background datasets with EF datasets                                                                            | Lit. + EF | 0.269 | kg                                                                                                      |                                                                                                                                                                                                                                |
|                   | Avoided virgin HDPE production                                                                                                       | [EU-28] Polyethylene high density granulate (HDPE/PE-HD); polymerisation of fossil-based ethylene   production mix, at plant<br>Cradle-to-gate dataset based on EF datasets for crude oil/natural gas supply, and TS datasets for refining and downstream conversion and polymerisation (black-box) as better detailed in the fossil-based HDPE LCI model for the stages of "Feedstock supply" and "Polymer production" | EF + TS   | 0.242 | kg                                                                                                      | Qs/Qp = 0.9<br>Replacement of fossil-based HDPE only is assumed (the estimated market share of bio-based HDPE is negligible, i.e. 0.2%).<br>We assumed that recycled HDPE only replaces EU domestically produced virgin resin. |
|                   | Incineration (19%)                                                                                                                   | [EU-28] Plastic waste collection and transport, as residual waste<br>Developed based on data in Rigamonti et al. (2013) and EF background datasets                                                                                                                                                                                                                                                                      | Lit. + EF | 0.190 | kg                                                                                                      | R3 = 19%                                                                                                                                                                                                                       |
|                   |                                                                                                                                      | [EU-28] Polyethylene (PE) (biobased) in waste incineration plant; waste-to-energy plant with dry flue gas treatment, without collection, transport and pre-treatment   production mix, at plant   Net calorific value 43.5 MJ/kg {cc4b53c3-bffa-4285-b2ba-0fb9362f44e6}                                                                                                                                                 | TS        | 0.190 | kg                                                                                                      |                                                                                                                                                                                                                                |
| Landfilling (17%) | [EU-28] Plastic waste collection, as residual waste<br>Developed based on data in Rigamonti et al. (2013) and EF background datasets | Lit. + EF                                                                                                                                                                                                                                                                                                                                                                                                               | 0.170     | kg    | (1-R2-R3) = 17%<br>Fossil CO <sub>2</sub> and CH <sub>4</sub> emissions converted to biogenic emissions |                                                                                                                                                                                                                                |

Table S4. List of processes included in the LCI model of polylactic acid from organic waste (OW-PLA). EF: Environmental Footprint; EI: Ecoinvent; Lit: dataset built from literature; TS: Thinkstep. The End-of-Life illustrated herein is the average EU End-of-Life treatment mix used in the default scenario calculation.

| Life Cycle Stage                           | Process                                                                              | Dataset                                                                                                                                                                                                                                                                                                                                                                                     | Source    | Quantity | Unit  | Comments                                                                                                |
|--------------------------------------------|--------------------------------------------------------------------------------------|---------------------------------------------------------------------------------------------------------------------------------------------------------------------------------------------------------------------------------------------------------------------------------------------------------------------------------------------------------------------------------------------|-----------|----------|-------|---------------------------------------------------------------------------------------------------------|
| Feedstock supply                           | Organic waste collection                                                             | Separate collection of organic waste (OW) as modelled in Albizzati et al. (2020).                                                                                                                                                                                                                                                                                                           | Lit.      |          | kg    | Taken from Albizzati et al. (2020). Please refer to Albizzati et al. (2020) for the complete inventory. |
| Polymer production                         | Lactic acid production                                                               | Inventory modelled departing from the study of Kwan et al. (2018) and adapted to the yield of glucose (and subsequently lactic acid) from food waste.                                                                                                                                                                                                                                       | Lit.      |          | kg    | Taken from Albizzati et al. (2020). Please refer to Albizzati et al. (2020) for the complete inventory. |
|                                            | PLA production                                                                       | Lactic acid is converted into PLA. Note that the efficiencies for lactic acid to lactide (i.e. 73%), lactide recovery (93%), and lactide to polylactic acid (74%) reported in Kwan et al. (2018) are used to calculate the conversion of food waste powder into polylactic acid. Rejects arising with the target product manufacture are assumed to be treated through anaerobic digestion. | Lit.      |          | kg    | Taken from Albizzati et al. (2020). Please refer to Albizzati et al. (2020) for the complete inventory. |
| Transport                                  | Transport of polymer granulate to article production site (from supplier to factory) | [EU-28+3] Articulated lorry transport, Euro 4, Total weight >32 t (without fuel); diesel driven, Euro 4, cargo   consumption mix, to consumer   more than 32t gross weight / 24.7t payload capacity {938d5ba6-17e4-4f0d-bef0-481608681f57}                                                                                                                                                  | EF        |          | kg*km | 130 km by truck (>32 t, EURO 4, default utilisation ratio)                                              |
|                                            |                                                                                      | [EU-28+3] Freight train, average (without fuel); technology mix, electricity and diesel driven, cargo   consumption mix, to consumer   average train, gross tonne weight 1000t / 726t payload capacity {02e87631-6d70-48ce-affd-1975dc36f5be}                                                                                                                                               | EF        |          | kg*km | 240 km by train (average freight train)                                                                 |
|                                            |                                                                                      | [EU-28+3] Barge; technology mix, diesel driven, cargo   consumption mix, to consumer   1500 t payload capacity {4cfacea0-cce4-4b4d-bd2b-223c8d4c90ae}                                                                                                                                                                                                                                       | EF        |          | kg*km | 270 km by ship (barge)                                                                                  |
| Product manufacturing (incl. distribution) | Injection moulding                                                                   | Injection moulding plastic injection moulding production mix, at plant for PP, HDPE and PE [EU-28+EFTA] [LCI result] {ec9ca75e-abdb-4d2e-9e18-ca1f5709a76d}                                                                                                                                                                                                                                 | EF        | 1.023    | kg    | Approximates "extrusion blow moulding" used for HDPE bottles (99.9 % efficiency, i.e. 0.1% losses)      |
|                                            | Recycling of loss from injection moulding                                            | [EU-28] Polylactic acid (PLA) in waste incineration plant, waste-to-energy plant with dry flue gas treatment, without collection, transport and pre-treatment   production mix, at plant   Net calorific value 17.9 MJ/kg {00b5480b-b622-4acd-8481-812d866e15a9}                                                                                                                            | Lit. + EF | 0.031    | kg    |                                                                                                         |
|                                            | Transport of panel from factory to final client                                      | [EU-28+3] Articulated lorry transport, Euro 4, Total weight >32 t (without fuel); diesel driven, Euro 4, cargo   consumption mix, to consumer   more than 32t gross weight / 24.7t payload capacity {938d5ba6-17e4-4f0d-bef0-481608681f57}                                                                                                                                                  | EF        | 552.960  | kg*km | Qs/Qo = 0.9<br>Replacement of fossil-based HDPE only is assumed                                         |

|                                                                                                                                                                                                                                                                         |                                                                                                                                      |                                                                                                                                                                                                                                                                                                                                                                                                                         |           |       |                                                                                               |                                                                                                                                                        |
|-------------------------------------------------------------------------------------------------------------------------------------------------------------------------------------------------------------------------------------------------------------------------|--------------------------------------------------------------------------------------------------------------------------------------|-------------------------------------------------------------------------------------------------------------------------------------------------------------------------------------------------------------------------------------------------------------------------------------------------------------------------------------------------------------------------------------------------------------------------|-----------|-------|-----------------------------------------------------------------------------------------------|--------------------------------------------------------------------------------------------------------------------------------------------------------|
|                                                                                                                                                                                                                                                                         | Transport of bottles from factory to final user                                                                                      | [EU-28+3] Articulated lorry transport, Euro 3, Total weight <7.5 t (without fuel) diesel driven, Euro 3, cargo   consumption mix, to consumer   up to 7,5t gross weight / 3,3t payload capacity {aea613ae-573b-443a-aba2-6a69900ca2ff}                                                                                                                                                                                  | EF        | 0.036 | kg*km                                                                                         | From factory to retail<br>Local supply chain: 1'200 km by truck (>32 t, EURO 4, default utilisation ratio)                                             |
|                                                                                                                                                                                                                                                                         |                                                                                                                                      | [GLO] Passenger car, average; technology mix, gasoline and diesel driven, Euro 3-5, passenger car   consumption mix, to consumer   engine size from 1,4l up to >2l {lead35dd-fc71-4b0c-9410-7e39da95c7dc}                                                                                                                                                                                                               | EF        |       | km                                                                                            | From retail to final client:<br>62% by car - 5 km (passenger car, average, default allocation)                                                         |
| End-of-Life                                                                                                                                                                                                                                                             | Recycling (64%)                                                                                                                      | [EU-28] Plastic waste collection for recycling<br>Developed based on data in Rigamonti et al. (2013) and EF background datasets                                                                                                                                                                                                                                                                                         | Lit. + EF |       | kg                                                                                            | R2 = 64%<br>$\eta = 84\%$ (efficiency recycling)                                                                                                       |
|                                                                                                                                                                                                                                                                         |                                                                                                                                      | [EU-28] Plastic waste sorting at MRF<br>Developed based on foreground LCI data from Franklin Associates (2018) and background EF datasets                                                                                                                                                                                                                                                                               | Lit. + EF |       | kg                                                                                            |                                                                                                                                                        |
|                                                                                                                                                                                                                                                                         |                                                                                                                                      | [EU-28] Polyethylene, high-density, granulate, secondary, from post-consumer plastic waste<br>Based on theecoinvent dataset "[Europe without Switzerland] Polyethylene production, high density, granulate, recycled" updated with data in the latest Franklin Associates (2018) report, and replacing background datasets with EF datasets                                                                             | Lit. + EF |       | kg                                                                                            |                                                                                                                                                        |
|                                                                                                                                                                                                                                                                         | Avoided virgin HDPE production                                                                                                       | [EU-28] Polyethylene high density granulate (HDPE/PE-HD); polymerisation of fossil-based ethylene   production mix, at plant<br>Cradle-to-gate dataset based on EF datasets for crude oil/natural gas supply, and TS datasets for refining and downstream conversion and polymerisation (black-box) as better detailed in the fossil-based HDPE LCI model for the stages of "Feedstock supply" and "Polymer production" | EF + TS   |       | kg                                                                                            | Qs/Qo = 0.9<br>Replacement of fossil-based HDPE only is assumed.<br>We assumed that recycled HDPE only replaces EU domestically produced virgin resin. |
|                                                                                                                                                                                                                                                                         | Incineration (19%)                                                                                                                   | [EU-28] Plastic waste collection and transport, as residual waste<br>Developed based on data in Rigamonti et al. (2013) and EF background datasets                                                                                                                                                                                                                                                                      | Lit. + EF |       | kg                                                                                            | R3 = 19%                                                                                                                                               |
| [EU-28] Polyethylene (PE) (biobased) in waste incineration plant; waste-to-energy plant with dry flue gas treatment, without collection, transport and pre-treatment   production mix, at plant   Net calorific value 43.5 MJ/kg {cc4b53c3-bffa-4285-b2ba-0fb9362f44e6} |                                                                                                                                      | TS                                                                                                                                                                                                                                                                                                                                                                                                                      |           | kg    |                                                                                               |                                                                                                                                                        |
| Landfilling (17%)                                                                                                                                                                                                                                                       | [EU-28] Plastic waste collection, as residual waste<br>Developed based on data in Rigamonti et al. (2013) and EF background datasets | Lit. + EF                                                                                                                                                                                                                                                                                                                                                                                                               |           | kg    | (1-R2-R3) = 17%<br>Fossil CO <sub>2</sub> and CH <sub>4</sub> emissions converted to biogenic |                                                                                                                                                        |

|  |  |                                                                                                                                                                                                                                                                                                                  |    |  |    |           |
|--|--|------------------------------------------------------------------------------------------------------------------------------------------------------------------------------------------------------------------------------------------------------------------------------------------------------------------|----|--|----|-----------|
|  |  | <i>[EU-28+EFTA] Landfill of plastic waste; landfill including leachate treatment and with transport without collection and pre-treatment / production mix (region specific sites), / The carbon and water content are respectively of 62%C and 0% Water (in weight %) [f2bea0f5-e4b7-4a2c-9f34-4eb32495cbc6]</i> | EF |  | kg | emissions |
|--|--|------------------------------------------------------------------------------------------------------------------------------------------------------------------------------------------------------------------------------------------------------------------------------------------------------------------|----|--|----|-----------|

## 1.2 Rigid panels for automotive sector

Table S5. List of processes included in the LCI model of polypropylene (PP). EF: Environmental Footprint; EI: Ecoinvent; Lit: dataset built from literature; TS: Thinkstep. The End-of-Life illustrated herein is the average EU End-of-Life treatment mix used in the default scenario calculation.

| Life cycle stage   | Process                                        | Dataset                                                                                                                                                                                                                                         | Database | Quantity | Unit | Comments                                                                                                                                                                                                                                                                                                                                                                                                                                                                                                                                                                                                                    |
|--------------------|------------------------------------------------|-------------------------------------------------------------------------------------------------------------------------------------------------------------------------------------------------------------------------------------------------|----------|----------|------|-----------------------------------------------------------------------------------------------------------------------------------------------------------------------------------------------------------------------------------------------------------------------------------------------------------------------------------------------------------------------------------------------------------------------------------------------------------------------------------------------------------------------------------------------------------------------------------------------------------------------------|
| Feedstock supply   | Crude oil extraction and transport             | [EU-27] Crude oil mix; technology mix of conventional (primary, secondary and tertiary production) and unconventional production (oil sands, in-situ) / consumption mix, to consumer {03bcbe8f-b957-43dc-9c9e-020836c954a6}                     | EF       | 0.900    | kg   | As input to Naphtha production (oil refining)<br>1.08 kg crude oil / kg naphtha                                                                                                                                                                                                                                                                                                                                                                                                                                                                                                                                             |
|                    | Natural gas extraction and transport           | [EU-27] Natural gas mix; technology mix / consumption mix, to consumer / medium pressure level (< 1 bar) {8ede8686-62d3-46d6-9ce6-59476542bdb0}                                                                                                 | EF       | 0.0175   | kg   | As input to Naphtha production (oil refining)<br>0.0213 kg natural gas / kg naphtha                                                                                                                                                                                                                                                                                                                                                                                                                                                                                                                                         |
|                    |                                                |                                                                                                                                                                                                                                                 |          | 0.280    | kg   | As input to Propylene production (naphtha cracking)<br>0.272 kg natural gas/ kg PP (cracking)                                                                                                                                                                                                                                                                                                                                                                                                                                                                                                                               |
|                    | Oil refining (naphtha production)              | [EU-28] Naphtha at refinery - open flows crude oil, natural gas; from crude oil / production mix, at refinery / 44 MJ/ kg net calorific value {914dfb2a-bc7b-4829-942f-c3089fb10de8}                                                            | TS       | 0.823    | kg   | As input to Propylene production<br>0.798 kg naphtha / kg PP                                                                                                                                                                                                                                                                                                                                                                                                                                                                                                                                                                |
|                    | Transport of naphtha to cracking               | [EU-28] Naphtha transport to industrial user, via pipeline<br>Based on transport-related burdens in the ecoinvent dataset "[RER] market for naphtha {b1561c62-5141-4469-82bb-65a2f6287017}", with the adjustments reported in the comment field | EI+EF    | 0.823    | kg   | The following adjustments are made, compared to the original ecoinvent datasets:<br>- Transport by rail, road and barge have been entirely converted to onshore pipeline transport (more appropriate for industrial uses of naphtha). Distances could not be individually adjusted to be consistent with the share of pipeline transport already included<br>- Background energy datasets (electricity) have been replaced with EF datasets<br>- EoL treatment of fly ash & scrubber sludge, rainwater mineral oil storage, and wastewater treatment have been entirely modelled for the geography "Europe w/o Switzerland" |
| Polymer production | Cracking (propylene production) polymerisation | [EU-28] Polypropylene Granulate (PP) - open flows naphtha, natural gas; polymerisation of propene / production mix, at plant / 0.91 g/cm3, 42.08 g/mol per repeating unit {89f3d71a-73f4-4650-bd46-12978231871f}                                | TS       | 1.031    | kg   | Black-box dataset covering all supply-chain processes from naphtha/feedstock conversion to polymerisation. Accounts for 3% losses at the production stage                                                                                                                                                                                                                                                                                                                                                                                                                                                                   |

|                                            |                                                                                                                  |                                                                                                                                                                                                                                                                                                                                     |           |         |       |                                                                                                                                                                                                                                                            |
|--------------------------------------------|------------------------------------------------------------------------------------------------------------------|-------------------------------------------------------------------------------------------------------------------------------------------------------------------------------------------------------------------------------------------------------------------------------------------------------------------------------------|-----------|---------|-------|------------------------------------------------------------------------------------------------------------------------------------------------------------------------------------------------------------------------------------------------------------|
|                                            | Transport of polymer granulate to article production site (from supplier to factory) - EU production (90%)       | [EU-28+3] Articulated lorry transport, Euro 4, Total weight >32 t (without fuel); diesel driven, Euro 4, cargo   consumption mix, to consumer   more than 32t gross weight / 24,7t payload capacity {938d5ba6-17e4-4f0d-bef0-481608681f57}                                                                                          | EF        | 77.196  | kg*km | 130 km by truck (>32 t, EURO 4), case-specific utilisation ratio                                                                                                                                                                                           |
|                                            |                                                                                                                  | [EU-28+3] Freight train, average (without fuel); technology mix, electricity and diesel driven, cargo   consumption mix, to consumer   average train, gross tonne weight 1000t / 726t payload capacity {02e87631-6d70-48ce-affd-1975dc36f5be}                                                                                       | EF        | 222.680 | kg*km | 240 km by train (average freight train)                                                                                                                                                                                                                    |
|                                            |                                                                                                                  | [EU-28+3] Barge; technology mix, diesel driven, cargo   consumption mix, to consumer   1500 t payload capacity {4cfacea0-cce4-4b4d-bd2b-223c8d4c90ae}                                                                                                                                                                               | EF        | 250.515 | kg*km | 270 km by ship (barge)                                                                                                                                                                                                                                     |
|                                            | Transport of polymer granulate to article production site (from supplier to factory) - Extra-EU production (10%) | [EU-28+3] Articulated lorry transport, Euro 4, Total weight >32 t (without fuel); diesel driven, Euro 4, cargo   consumption mix, to consumer   more than 32t gross weight / 24,7t payload capacity {938d5ba6-17e4-4f0d-bef0-481608681f57}                                                                                          | EF        | 65.979  | kg*km | 1000 km by truck (>32 t, EURO 4, default utilisation ratio), for the sum of distances from harbour/airport to factory outside and inside Europe<br>Based on an overall weighted average sea distance between importing countries and EU equal to 10,796 km |
|                                            |                                                                                                                  | [GLO] Transoceanic ship, containers; heavy fuel oil driven, cargo   consumption mix, to consumer   27.500 dwt payload capacity, ocean going {6ca61112-1d5b-473c-abfa-4accc66a8a63}                                                                                                                                                  | EF        | 887.596 | kg*km |                                                                                                                                                                                                                                                            |
|                                            |                                                                                                                  | [EU-28+3] Articulated lorry transport, Euro 4, Total weight >32 t (without fuel); diesel driven, Euro 4, cargo   consumption mix, to consumer   more than 32t gross weight / 24,7t payload capacity {938d5ba6-17e4-4f0d-bef0-481608681f57}                                                                                          | EF        | 65.979  | kg*km |                                                                                                                                                                                                                                                            |
| Product manufacturing (incl. distribution) | Injection moulding                                                                                               | Injection moulding plastic injection moulding production mix, at plant for PP, HDPE and PE [EU-28+EFTA] [LCI result] {ec9ca75e-abdb-4d2e-9e18-ca1f5709a76d}                                                                                                                                                                         | EF        | 1.031   | kg    | 30 g of waste per kg of product.                                                                                                                                                                                                                           |
|                                            | Recycling of loss from injection moulding                                                                        | [EU-28] Polypropylene (PP) granulate, secondary, from post-consumer plastic waste<br>Based on the ecoinvent dataset "[Europe without Switzerland] Polyethylene production, high density, granulate, recycled" updated with data in the latest Franklin Associates (2018) report, and replacing background datasets with EF datasets | Lit. + EF | 0.015   | kg    |                                                                                                                                                                                                                                                            |
|                                            | Avoided virgin PP production                                                                                     | Cradle-to-gate dataset based on EF datasets for crude oil/natural gas supply, and TS datasets for refining and downstream conversion and polymerisation (black-box) as better detailed above for the stages of "Feedstock supply" and "Polymer production"                                                                          | EF + TS   | 0.012   | kg    |                                                                                                                                                                                                                                                            |
|                                            | Transport of panel from factory to final client                                                                  | [EU-28+3] Articulated lorry transport, Euro 4, Total weight >32 t (without fuel); diesel driven, Euro 4, cargo   consumption mix, to consumer   more than 32t gross weight / 24,7t payload capacity {938d5ba6-17e4-4f0d-bef0-481608681f57}                                                                                          | EF        | 768.000 | kg*km | From factory to retail<br>Local supply chain: 1'200 km by truck (>32 t, EURO 4, default utilisation ratio)                                                                                                                                                 |
|                                            |                                                                                                                  | [EU-28+3] Articulated lorry transport, Euro 3, Total weight <7.5 t (without fuel) diesel driven, Euro 3, cargo   consumption mix, to consumer   up to 7,5t gross weight / 3,3t payload capacity {aea613ae-573b-443a-aba2-6a69900ca2ff}                                                                                              | EF        | 0.050   | kg*km | From retail to final client:<br>5% by delivery van – 5 km round trip (lorry <7.5t, EURO 3, with utilisation ratio of 20%)                                                                                                                                  |
| End-of-Life                                | Recycling/Reuse (97%)                                                                                            | [EU-28] Polypropylene (PP) granulate, secondary, from post-consumer plastic waste<br>Based on the ecoinvent dataset "[Europe without Switzerland] Polyethylene                                                                                                                                                                      | Lit. + EF | 0.485   | kg    | R2 = 97%<br>η = 85.8% (efficiency recycling)                                                                                                                                                                                                               |



|  |                              |                                                                                                                                                                                                                                                                                                                  |         |       |    |                                              |
|--|------------------------------|------------------------------------------------------------------------------------------------------------------------------------------------------------------------------------------------------------------------------------------------------------------------------------------------------------------|---------|-------|----|----------------------------------------------|
|  |                              | <i>production, high density, granulate, recycled"</i> updated with data in the latest Franklin Associates (2018) report, and replacing background datasets with EF datasets                                                                                                                                      |         |       |    |                                              |
|  | Avoided virgin PP production | Cradle-to-gate dataset based on EF datasets for crude oil/natural gas supply, and TS datasets for refining and downstream conversion and polymerisation (black-box) as better detailed above for the stages of "Feedstock supply" and "Polymer production"                                                       | EF + TS | 0.421 | kg | Qs/Qo = 0.9<br>Displacement of PP is assumed |
|  | Incineration (2%)            | <i>Polypropylene (PP) in waste incineration plant, waste-to-energy plant with dry flue gas treatment, without collection, transport and pre-treatment, EU-28 {f39b6710-30b8-4672-9a73-cc06607e652d}</i>                                                                                                          | EF      | 0.020 | kg | R3 = 2%                                      |
|  | Landfill (1%)                | <i>[EU-28+EFTA] Landfill of plastic waste; landfill including leachate treatment and with transport without collection and pre-treatment / production mix (region specific sites),   The carbon and water content are respectively of 62%C and 0% Water (in weight %) {f2bea0f5-e4b7-4a2c-9f34-4eb32495cbc6}</i> | EF      | 0.010 | kg | (1-R2-R3) = 1%                               |

Table S6. List of processes included in the LCI model of recycled polypropylene (R-PP). EF: Environmental Footprint; EI: Ecoinvent; Lit: dataset built from literature; TS: Thinkstep. The End-of-Life illustrated herein is the average EU End-of-Life treatment mix used in the default scenario calculation.

| Life cycle stage                           | Process                                                                              | Dataset                                                                                                                                                                                                                                                                                                                             | Database  | Quantity | Unit  | Comments                                                                                                   |
|--------------------------------------------|--------------------------------------------------------------------------------------|-------------------------------------------------------------------------------------------------------------------------------------------------------------------------------------------------------------------------------------------------------------------------------------------------------------------------------------|-----------|----------|-------|------------------------------------------------------------------------------------------------------------|
| Feedstock supply (recycled)                | Plastic waste collection                                                             | [EU-28] Plastic waste collection for recycling<br>Developed based on data in Rigamonti et al. (2013) and EF background datasets                                                                                                                                                                                                     | Lit. + EF | 0.608    | kg    |                                                                                                            |
|                                            | Plastic waste sorting                                                                | [EU-28] Plastic waste sorting at MRF<br>Developed based on foreground LCI data from Franklin Associates (2018) and background EF datasets                                                                                                                                                                                           | Lit. + EF | 0.608    | kg    |                                                                                                            |
| Polymer production                         | Secondary PP production (recycling)                                                  | [EU-28] Polypropylene (PP) granulate, secondary, from post-consumer plastic waste<br>Based on the ecoinvent dataset "[Europe without Switzerland] Polyethylene production, high density, granulate, recycled" updated with data in the latest Franklin Associates (2018) report, and replacing background datasets with EF datasets | Lit. + EF | 0.515    | kg    |                                                                                                            |
|                                            | Transport of polymer granulate to article production site (from supplier to factory) | [EU-28+3] Articulated lorry transport, Euro 4, Total weight >32 t (without fuel); diesel driven, Euro 4, cargo   consumption mix, to consumer   more than 32t gross weight / 24,7t payload capacity {938d5ba6-17e4-4f0d-bef0-481608681f57}                                                                                          | EF        | 85.773   | kg*km | 130 km by truck (>32 t, EURO 4), case-specific utilisation ratio                                           |
|                                            |                                                                                      | [EU-28+3] Freight train, average (without fuel); technology mix, electricity and diesel driven, cargo   consumption mix, to consumer   average train, gross tonne weight 1000t / 726t payload capacity {02e87631-6d70-48ce-affd-1975dc36f5be}                                                                                       | EF        | 247.423  | kg*km | 240 km by train (average freight train)                                                                    |
|                                            |                                                                                      | [EU-28+3] Barge; technology mix, diesel driven, cargo   consumption mix, to consumer   1500 t payload capacity {4cfacea0-cce4-4b4d-bd2b-223c8d4c90ae}                                                                                                                                                                               | EF        | 278.351  | kg*km | 270 km by ship (barge)                                                                                     |
| Product manufacturing (incl. distribution) | Injection moulding                                                                   | Injection moulding plastic injection moulding production mix, at plant for PP, HDPE and PE [EU-28+EFTA] [LCI result] {ec9ca75e-abdb-4d2e-9e18-ca1f5709a76d}                                                                                                                                                                         | EF        | 1.031    | kg    | 30 g of waste per kg of product.                                                                           |
|                                            | Recycling of loss from injection moulding                                            | [EU-28] Polypropylene (PP) granulate, secondary, from post-consumer plastic waste<br>Based on the ecoinvent dataset "[Europe without Switzerland] Polyethylene production, high density, granulate, recycled" updated with data in the latest Franklin Associates (2018) report, and replacing background datasets with EF datasets | Lit. + EF | 0.015    | kg    |                                                                                                            |
|                                            | Avoided virgin PP production                                                         | Cradle-to-gate dataset based on EF datasets for crude oil/natural gas supply, and TS datasets for refining and downstream conversion and polymerisation (black-box) as better detailed above for the stages of "Feedstock supply" and "Polymer production"                                                                          | EF + TS   | 0.012    | kg    |                                                                                                            |
|                                            | Transport of panel from factory to final client                                      | [EU-28+3] Articulated lorry transport, Euro 4, Total weight >32 t (without fuel); diesel driven, Euro 4, cargo   consumption mix, to consumer   more than 32t gross weight / 24,7t payload capacity {938d5ba6-17e4-4f0d-bef0-481608681f57}                                                                                          | EF        | 768.000  | kg*km | From factory to retail<br>Local supply chain: 1'200 km by truck (>32 t, EURO 4, default utilisation ratio) |
|                                            |                                                                                      | [EU-28+3] Articulated lorry transport, Euro 3, Total weight <7.5 t (without fuel) diesel driven, Euro 3, cargo   consumption mix, to                                                                                                                                                                                                | EF        | 0.050    | kg*km | From retail to final client:<br>5% by delivery van – 5 km round                                            |

|             |                              |                                                                                                                                                                                                                                                                                                                                             |           |       |    |                                                           |
|-------------|------------------------------|---------------------------------------------------------------------------------------------------------------------------------------------------------------------------------------------------------------------------------------------------------------------------------------------------------------------------------------------|-----------|-------|----|-----------------------------------------------------------|
|             |                              | <i>consumer / up to 7,5t gross weight / 3,3t payload capacity<br/>{aea613ae-573b-443a-aba2-6a69900ca2ff}</i>                                                                                                                                                                                                                                |           |       |    | trip (lorry <7.5t, EURO 3, with utilisation ratio of 20%) |
| End-of-Life | Recycling/Reuse (97%)        | <i>[EU-28] Polypropylene (PP) granulate, secondary, from post-consumer plastic waste<br/>Based on the ecoinvent dataset "[Europe without Switzerland] Polyethylene production, high density, granulate, recycled" updated with data in the latest Franklin Associates (2018) report, and replacing background datasets with EF datasets</i> | Lit. + EF | 0.485 | kg | R2 = 97%<br>η = 85.8% (efficiency recycling)              |
|             | Avoided virgin PP production | <i>Cradle-to-gate dataset based on EF datasets for crude oil/natural gas supply, and TS datasets for refining and downstream conversion and polymerisation (black-box) as better detailed above for the stages of "Feedstock supply" and "Polymer production"</i>                                                                           | EF + TS   | 0.421 | kg | Qs/Q <sub>o</sub> = 0.9<br>Displacement of PP is assumed  |
|             | Incineration (2%)            | <i>Polypropylene (PP) in waste incineration plant, waste-to-energy plant with dry flue gas treatment, without collection, transport and pre-treatment, EU-28 {f39b6710-30b8-4672-9a73-cc06607e652d}</i>                                                                                                                                     | EF        | 0.020 | kg | R3 = 2%                                                   |
|             | Landfill (1%)                | <i>[EU-28+EFTA] Landfill of plastic waste; landfill including leachate treatment and with transport without collection and pre-treatment / production mix (region specific sites),   The carbon and water content are respectively of 62% C and 0% Water (in weight %)<br/>{f2bea0f5-e4b7-4a2c-9f34-4eb32495cbc6}</i>                       | EF        | 0.010 | kg | (1-R2-R3) = 1%                                            |

Table S7. List of processes included in the LCI model of Polybutylene Succinate (B-PBS). EF: Environmental Footprint; EI: Ecoinvent; Lit: dataset built from literature; TS: Thinkstep. The End-of-Life illustrated herein is the average EU End-of-Life treatment mix used in the default scenario calculation.

| Life cycle stage                           | Process                                                                                                  | Dataset                                                                                                                                                                                                                                                                                    | Database  | Quantity | Unit  | Comments                                                                                                               |
|--------------------------------------------|----------------------------------------------------------------------------------------------------------|--------------------------------------------------------------------------------------------------------------------------------------------------------------------------------------------------------------------------------------------------------------------------------------------|-----------|----------|-------|------------------------------------------------------------------------------------------------------------------------|
| Polymer production                         | Corn production transport, starch hydrolysis, fermentation, filtration, esterification, polycondensation | <i>Polybutylene succinate (PBS) (biobased from corn); technology mix, starch hydrolysis, fermentation, filtration, esterification, polycondensation; production mix, at producer; from US corn, water content &lt;0,5 w% {dcd6c006-63aa-49c9-9e01-ba62ed597f52}</i>                        | TS        | 1.031    | kg    | Accounts for 3% losses at the production stage.                                                                        |
|                                            | Transport of polymer granulate to article production site (from supplier to factory)                     | <i>[EU-28+3] Articulated lorry transport, Euro 4, Total weight &gt;32 t (without fuel); diesel driven, Euro 4, cargo   consumption mix, to consumer   more than 32t gross weight / 24,7t payload capacity {938d5ba6-17e4-4f0d-bef0-481608681f57}</i>                                       | EF        | 85.773   | kg*km | 130 km by truck (>32 t, EURO 4), case-specific utilisation ratio                                                       |
|                                            |                                                                                                          | <i>[EU-28+3] Freight train, average (without fuel); technology mix, electricity and diesel driven, cargo   consumption mix, to consumer   average train, gross tonne weight 1000t / 726t payload capacity {02e87631-6d70-48ce-affd-1975dc36f5be}</i>                                       | EF        | 247.422  | kg*km | 240 km by train (average freight train)                                                                                |
|                                            |                                                                                                          | <i>[EU-28+3] Barge; technology mix, diesel driven, cargo   consumption mix, to consumer   1500 t payload capacity {4cfacea0-cce4-4b4d-bd2b-223c8d4c90ae}</i>                                                                                                                               | EF        | 278.351  | kg*km | 270 km by ship (barge)                                                                                                 |
| Product manufacturing (incl. distribution) | Injection moulding                                                                                       | <i>Injection moulding plastic injection moulding production mix, at plant for PP, HDPE and PE [EU-28+EFTA] [LCI result] {ec9ca75e-abdb-4d2e-9e18-ca1f5709a76d}</i>                                                                                                                         | EF        | 1.031    | kg    | 30 g of waste per kg of product.                                                                                       |
|                                            | Incineration of loss from injection moulding                                                             | <i>[EU-28] Incineration of Bio-PBS in MSW incineration plant Dataset developed based on the Doka (2011) tool for the modelling of material incineration in waste-to-energy plants, and EF background datasets. The dataset already includes energy (electricity and heat) substitution</i> | Lit. + EF | 0.031    | kg    |                                                                                                                        |
|                                            | Transport of panel from factory to final client                                                          | <i>[EU-28+3] Articulated lorry transport, Euro 4, Total weight &gt;32 t (without fuel); diesel driven, Euro 4, cargo   consumption mix, to consumer   more than 32t gross weight / 24,7t payload capacity {938d5ba6-17e4-4f0d-bef0-481608681f57}</i>                                       | EF        | 768.000  | kg*km | From factory to retail Local supply chain: 1'200 km by truck (>32 t, EURO 4, default utilisation ratio)                |
|                                            |                                                                                                          | <i>[EU-28+3] Articulated lorry transport, Euro 3, Total weight &lt;7.5 t (without fuel) diesel driven, Euro 3, cargo   consumption mix, to consumer   up to 7,5t gross weight / 3,3t payload capacity {aea613ae-573b-443a-aba2-6a69900ca2ff}</i>                                           | EF        | 0.050    | kg*km | From retail to final client: 5% by delivery van – 5 km round trip (lorry <7.5t, EURO 3, with utilisation ratio of 20%) |
| End-of-Life                                | Recycling/Reuse (97%)                                                                                    | <i>[EU-28] Plastic granulate secondary (low metal contamination); from post-consumer plastic waste, via grinding, metal separation, washing, pelletization; production mix, at plant; plastic waste with low metal fraction {3b801715-5e3f-426f-8b24-a84dbd4f3165}</i>                     | Lit. + EF | 0.485    | kg    | R2 = 97%<br>η = 85.8% (efficiency recycling)                                                                           |
|                                            | Avoided virgin PP production                                                                             | Cradle-to-gate dataset based on EF datasets for crude oil/natural gas supply, and TS datasets for refining and downstream conversion and polymerisation (black-box) as better detailed above for the stages of "Feedstock supply" and "Polymer production"                                 | EF + TS   | 0.445    | kg    | Qs/Qo = 0.9<br>Displacement of PP is assumed                                                                           |
|                                            | Incineration (2%)                                                                                        | <i>[EU-28] Incineration of Bio-PBS in MSW incineration plant Dataset developed based on the Doka (2011) tool for the modelling of</i>                                                                                                                                                      | EF        | 0.020    | kg    | R3 = 2%                                                                                                                |

|  |               |                                                                                                                                                                                                                                             |    |       |    |                |
|--|---------------|---------------------------------------------------------------------------------------------------------------------------------------------------------------------------------------------------------------------------------------------|----|-------|----|----------------|
|  |               | material incineration in waste-to-energy plants and EF background energy datasets (remaining datasets from ecoinvent). The dataset already includes energy (electricity and heat) substitution                                              |    |       |    |                |
|  | Landfill (1%) | <i>[EU-28] Landfilling of Bio-PBS, sanitary landfill</i><br>Dataset developed based on the Doka (2011) tool for the modelling of waste disposal in sanitary landfill, and EF background energy datasets (remaining datasets from ecoinvent) | EF | 0.010 | kg | (1-R2-R3) = 1% |

Table S8. List of processes included in the LCI model of polylactic acid from maize (MA-PLA). EF: Environmental Footprint; EI: Ecoinvent; Lit: dataset built from literature; TS: Thinkstep. The End-of-Life illustrated herein is the average EU End-of-Life treatment mix used in the default scenario calculation.

| Life cycle stage                           | Process                                                                                        | Dataset                                                                                                                                                                                                                                                                  | Database  | Quantity | Unit  | Comments                                                                                                                    |
|--------------------------------------------|------------------------------------------------------------------------------------------------|--------------------------------------------------------------------------------------------------------------------------------------------------------------------------------------------------------------------------------------------------------------------------|-----------|----------|-------|-----------------------------------------------------------------------------------------------------------------------------|
| Feedstock supply                           | Maize cultivation (US)                                                                         | [US] Maize (corn grain) production; technology mix   at farm {ad979027-fa48-4ce4-a010-7b21a2bb9934}                                                                                                                                                                      | EF        | 3.175    | kg    | 3.08 kg maize grain/kg PLA                                                                                                  |
|                                            | Transport of maize to processing                                                               | [EU-28+3] Articulated lorry transport, Euro 4, Total weight >32 t (without fuel); diesel driven, Euro 4, cargo   consumption mix, to consumer   more than 32t gross weight / 24,7t payload capacity {938d5ba6-17e4-4f0d-bef0-481608681f57}                               | EF        | 317.526  | kg    | 100 km by truck (default distance assumed in the underlying aggregated GaBi dataset)<br>US diesel is considered as an input |
| Polymer production                         | Wet milling, lactic acid production (dextrose fermentation), lactide formation, polymerisation | [EU-28] Polylactic acid (PLA) (Polylactide, continuous process) - open flow corn grains; lactide production from corn, continuous process   single route, at plant   1210-1430 kg/m <sup>3</sup> , 72.06 g/mol per repeating unit {6e6b78cf-15cc-4c65-bc59-6b93f8c539ec} | TS        | 1.031    | kg    | Account for 3% losses at the production stage                                                                               |
|                                            | Transport of polymer granulate to article production site (from US supplier to EU factory)     | [EU-28+3] Articulated lorry transport, Euro 4, Total weight >32 t (without fuel); diesel driven, Euro 4, cargo   consumption mix, to consumer   more than 32t gross weight / 24,7t payload capacity {938d5ba6-17e4-4f0d-bef0-481608681f57}                               | EF        | 659.794  | kg*km | 1000 km by truck for the sum of distances from harbour/airport to factory outside and inside Europe                         |
|                                            |                                                                                                | [GLO] Transoceanic ship, containers; heavy fuel oil driven, cargo   consumption mix, to consumer   27.500 dwt payload capacity, ocean going {6ca61112-1d5b-473c-abfa-4acc66a8a63}                                                                                        | EF        | 6185.567 | kg*km | 6000 km by ship<br>(6000 km from New York to Rotterdam)                                                                     |
|                                            |                                                                                                | [EU-28+3] Articulated lorry transport, Euro 4, Total weight >32 t (without fuel); diesel driven, Euro 4, cargo   consumption mix, to consumer   more than 32t gross weight / 24,7t payload capacity {938d5ba6-17e4-4f0d-bef0-481608681f57}                               | EF        | 659.794  | kg*km | 1000 km by truck for the sum of distances from harbour/airport to factory outside and inside Europe                         |
| Product manufacturing (incl. distribution) | Injection moulding                                                                             | Injection moulding plastic injection moulding production mix, at plant for PP, HDPE and PE [EU-28+EFTA] [LCI result] {ec9ca75e-abdb-4d2e-9e18-ca1f5709a76d}                                                                                                              | EF        | 1.031    | kg    | 30 g of waste per kg of product.                                                                                            |
|                                            | Recycling of loss from injection moulding                                                      | [EU-28] Polylactic acid (PLA) in waste incineration plant, waste-to-energy plant with dry flue gas treatment, without collection, transport and pre-treatment   production mix, at plant   Net calorific value 17.9 MJ/kg {00b5480b-b622-4acd-8481-812d866e15a9}         | Lit. + EF | 0.015    | kg    |                                                                                                                             |
|                                            | Transport of panel from factory to final client                                                | [EU-28+3] Articulated lorry transport, Euro 4, Total weight >32 t (without fuel); diesel driven, Euro 4, cargo   consumption mix, to consumer   more than 32t gross weight / 24,7t payload capacity {938d5ba6-17e4-4f0d-bef0-481608681f57}                               | EF        | 768.000  | kg*km | From factory to retail<br>Local supply chain: 1200 km by truck (>32 t, EURO 4, default utilisation ratio)                   |
|                                            |                                                                                                | [EU-28+3] Articulated lorry transport, Euro 3, Total weight <7.5 t (without fuel) diesel driven, Euro 3, cargo   consumption mix, to consumer   up to 7,5t gross weight / 3,3t payload capacity {aea613ae-573b-443a-aba2-6a69900ca2ff}                                   | EF        | 0.050    | kg*km | From retail to final client:<br>5% by delivery van – 5 km round trip (lorry <7.5t, EURO 3, with utilisation ratio of 20%)   |
| End-of-Life                                | Recycling/Reuse (97%)                                                                          | [EU-28] Plastic granulate secondary (low metal contamination); from post-consumer plastic waste, via grinding, metal separation, washing, pelletization; production mix, at plant; plastic waste with low metal fraction {3b801715-5e3f-426f-8b24-a84dbd4f3165}          | Lit. + EF | 0.485    | kg    | R2 = 97%<br>η = 85.8% (efficiency recycling)                                                                                |
|                                            | Avoided virgin PP production                                                                   | Cradle-to-gate dataset based on EF datasets for crude oil/natural gas supply, and TS datasets for refining and downstream conversion and polymerisation (black-box) as better detailed above for the stages of "Feedstock supply" and "Polymer production"               | EF + TS   | 0.421    | kg    | Qs/Qo = 0.9<br>Displacement of PP is assumed                                                                                |
|                                            | Incineration (2%)                                                                              | [EU-28] Polylactic acid (PLA) in waste incineration plant, waste-to-energy plant                                                                                                                                                                                         | EF        | 0.020    | kg    | R3 = 2%                                                                                                                     |

|  |               |                                                                                                                                                                                                                                         |    |       |    |              |
|--|---------------|-----------------------------------------------------------------------------------------------------------------------------------------------------------------------------------------------------------------------------------------|----|-------|----|--------------|
|  |               | <i>with dry flue gas treatment, without collection, transport and pre-treatment / production mix, at plant   Net calorific value 17.9 MJ/kg {00b5480b-b622-4acd-8481-812d866e15a9}</i>                                                  |    |       |    |              |
|  | Landfill (1%) | <i>[EU-28] Landfilling of PLA, sanitary landfill</i><br>Dataset developed based on the Doka (2011) tool for the modelling of waste disposal in sanitary landfill, and EF background energy datasets (remaining datasets from ecoinvent) | EF | 0.010 | kg | (1-R2-R3)=1% |

## 2. Dynamic (t-dependent) modelling of biogenic-C cycle

All parameters for the modelling of the time-dependent climate change impact are taken from the Myhre et al. (2013). The Impulse Response Function (*IRF*) represents the atmospheric decay of a pulse of CO<sub>2</sub> emission at time  $t$  (Eq. S1). Eq. S2 calculates the Radiative Forcing associated with a pulse emission of CO<sub>2</sub>.  $A_{CO_2}$  represents the radiative efficiency of CO<sub>2</sub> on a mass basis, while  $RE_{CO_2}$  represents the radiative efficiency of CO<sub>2</sub> on volume basis. Eq. S3 and Eq. S4 represent the symbolic and discrete formulations of the AGWP curves, as presented in Myhre et al. (2013). Eq. S5 describes the convolution operation between the AGWP curve with the function  $z(t)$  which represents the emission profile from the system considered. This calculation provides the Cumulative Radiative Forcing (*CRF*) associated to the emission profile  $z(t)$ . This metric represents the radiative forcing accumulated in the atmosphere due to the emission of  $z(t)$  up to the time  $T$  considered as the limit of integration. The parameters for Eq. S2 to S9 are taken from Myhre et al. (2013) and are detailed in Table S9 and Table S10.

$$IRF_{CO_2}(t) = a_0 + \sum_{i=1}^3 a_i \cdot \exp\left(-\frac{t}{\tau_i}\right) \quad (\text{Eq. S1})$$

$$RF_{CO_2}(t) = A_{CO_2} \cdot IRF_{CO_2}(t) \quad (\text{Eq. S2})$$

$$AGWP_{CO_2}(t) = \int_0^t RF_{CO_2}(t') dt' \quad (\text{Eq. S3})$$

$$AGWP_{CO_2}(t) = A_{CO_2} \cdot \left\{ a_0 \cdot t + \sum_{i=1}^3 a_i \cdot \tau_i \cdot \left( 1 - \exp\left(-\frac{t}{\tau_i}\right) \right) \right\} \quad (\text{Eq. S4})$$

$$CRF_{CO_2}(T) = \int_0^T z(T - T') \left( \int_0^{T'} \left( \int_0^t RF_{CO_2}(t') \cdot \delta T(t - t') dt' \right) dt \right) dT' \quad (\text{Eq. S5})$$

Table S9: Parameters used for the calculation of RF in Eq. S2.

| Parameter   | Value    | Unit                                    |
|-------------|----------|-----------------------------------------|
| $A_{CO_2}$  | 1.75E-15 | W * m <sup>-2</sup> * kg <sup>-1</sup>  |
| $RE_{CO_2}$ | 1.37E-5  | W * m <sup>-2</sup> * ppb <sup>-1</sup> |

Table S10: Parameters used for the calculation of IRF of CO<sub>2</sub> (Eq. S1).

| Parameter                | 1 <sup>st</sup> term | 2 <sup>nd</sup> term | 3 <sup>rd</sup> term | 4 <sup>th</sup> term | Unit  |
|--------------------------|----------------------|----------------------|----------------------|----------------------|-------|
| $a_i$                    | 0.2173               | 0.2240               | 0.2824               | 0.2763               | -     |
| $\tau_i$ CO <sub>2</sub> |                      | 394.4                | 36.54                | 4.304                | years |

### 2.1 Emission profiles for biogenic-C ( $z(t)$ )

The temporal boundary of our analysis starts at time = 0 when the biomass is harvested. In that year, biogenic-C is transferred from the biosphere to the technosphere to be embedded into the bio-based plastic. We then define several alternatives for the curves representing C-sequestration due to biomass re-growth and for the curves representing C-emissions at the End-of-life. We can then combine these multiple curves to create a matrix of biogenic-C cycle curves for different rotation periods and different EoL options. Figure S1 presents an example of biogenic-C cycle profile for two types of biomass feedstocks, with 1 and 80 years of rotation time, and C-emission through incineration after use for 20 years.



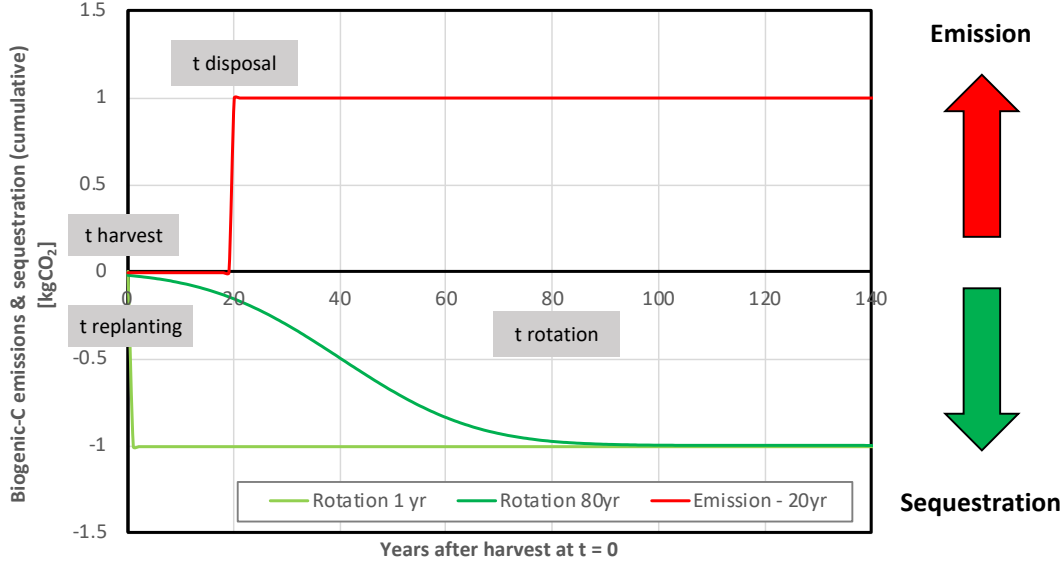

Figure S1: Biogenic-C emission and sequestration dynamics of 1 kg CO<sub>2</sub>. Two biomass growth curves are represented with different rotation times (1 yr = annual crop and 80 yr = forest feedstock), and emission of CO<sub>2</sub> due to disposal through incineration after 20 years of use.

To be noticed that all the cycle profile curves are defined for a single event, i.e. harvest of 1 kg CO<sub>2</sub>, re-sequestration of 1 kg CO<sub>2</sub>, and release or landfilling of 1 kg CO<sub>2</sub> at disposal. In other words, we do not model here the sustained harvest, sequestration, and EoL across multiple years. Additionally, we report in the SM different examples of emission profiles and characterization factors (GWP<sub>bio</sub>) even though only one case is considered in the article.

## 2.2 Biomass growth ( $z_{\text{growth}}(t)$ )

We define the growth curves for various rotation periods, thus representing different biomass feedstocks. We model the annual crop re-growth simply as re-absorbing within 1 year all the CO<sub>2</sub> removed through harvest. Following Guest et al. (2013), the other growth curves are simplified as Gaussian curves, with a mean value equal to half the rotation time, and the standard deviation equal to 0.25 times the rotation time, as illustrated in Eq. S6 where  $r$  stands for rotation time. All calculations are normalized over 1 kg CO<sub>2</sub>.

$$z_{\text{Growth}}(t, r) = -\frac{1}{\frac{r}{4}\sqrt{2\pi}} e^{-0.5\left(\frac{t-r/2}{r/4}\right)^2} \quad (\text{Eq. S6})$$

Figure S2 presents five examples of cumulative growth curves.

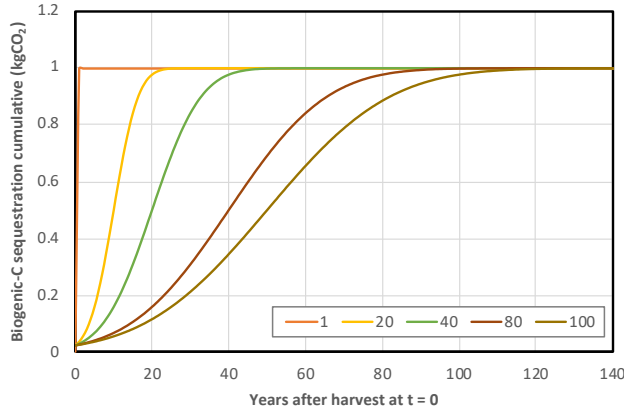

Figure S2: Cumulative curves for sequestration of biogenic-C after harvest taking place at  $t=0$ . The five curves represent five different rotation times for plant regrowth.

### 2.3 CO<sub>2</sub> emission curves / EoL curves ( $z_{EoL}(t)$ )

Secondly, we define a series of emission profiles for two options of EoL. For incineration, we model the pulse release of 1 kg CO<sub>2</sub> at different time steps after harvest. The time steps represent thus storage times of the biogenic-C in the technosphere before being released again to the atmosphere. Eq. S7 represents the function for the pulse release of 1 kg CO<sub>2</sub> in the year  $j = t_{\text{disposal}}$ .

For landfilling, we consider that 1% of the biogenic-C is released in 100 years, at the rate of 0.0001 kgC each year. As shown in Eq. S7, several options are considered as starting time for the landfilling ( $j$ ) to account for different useful life times of the bio-based product.

These emission profiles are actually valid also for the fossil-C embedded in fossil-based plastics to which the impact of bio-based plastics is compared.

$$z_{\text{Emission}}(t, j) = \begin{cases} 0 & \text{if } t \neq j \\ 1 & \text{if } t = j \end{cases} \quad (\text{Eq. S7})$$

$$z_{\text{Landfill}}(t, j) = \begin{cases} 0 & \text{if } t < j \\ 0.0001 & \text{if } j \leq t < j + 100 \\ 0 & \text{if } t \geq 100 + j \end{cases} \quad (\text{Eq. S8})$$

### 2.4 Cumulative Radiative Forcing curves

Once the biogenic-C and fossil-C profile curves are defined analytically, they can be convoluted with the analytical curve for AGWP to obtain the Cumulative Radiative Forcing (CRF) curves.

$$CRF_{CO_2\_Growth}(T, r) = \int_0^T z_{\text{Growth}}(T - T', r) \left( \int_0^{T'} \left( \int_0^t RF_{CO_2}(t') \cdot \delta T(t - t') dt' \right) dt \right) dT' \quad (\text{Eq. S9})$$

$$CRF_{CO_2\_Incineration}(T, j) = \int_0^T z_{\text{Emission}}(T - T', j) \left( \int_0^{T'} \left( \int_0^t RF_{CO_2}(t') \cdot \delta T(t - t') dt' \right) dt \right) dT' \quad (\text{Eq. S10})$$

$$CRF_{CO_2\_Landfill}(T, j) = \int_0^T z_{Landfill}(T - T', j) \left( \int_0^{T'} \left( \int_0^t RF_{CO_2}(t') \cdot \delta T(t - t') dt' \right) dt \right) dT'$$

(Eq. S11)

For this work, we defined both the growth-emission profiles as well as the climate metrics curves as discrete vectors, and then performed a discrete convolution using the software R. The function used to carry out the discrete convolution between vector x and y, is the following:

```
conv_numerical <- function(x, y) {
  nx <- length(x)
  ny <- length(y)
  xy <- nx + ny - 1
  xy <- rep(0, xy)
  for(i in (1:nx)){
    j <- 1:ny
    ij <- i + j - 1
    xy[i+(1:ny)-1] <- xy[ij] + x[i] * y
  }
  xy
}
```

The CRF curves for the various profiles of C-sequestration and C-emissions are represented in Figure S3 for clarity and transparency. To be noticed that the curve named ‘Emission\_0yr’ in Figure S3 (bottom), represents also the curve used by IPCC AR5 as a denominator in the definition of the GWP factors for all gases.

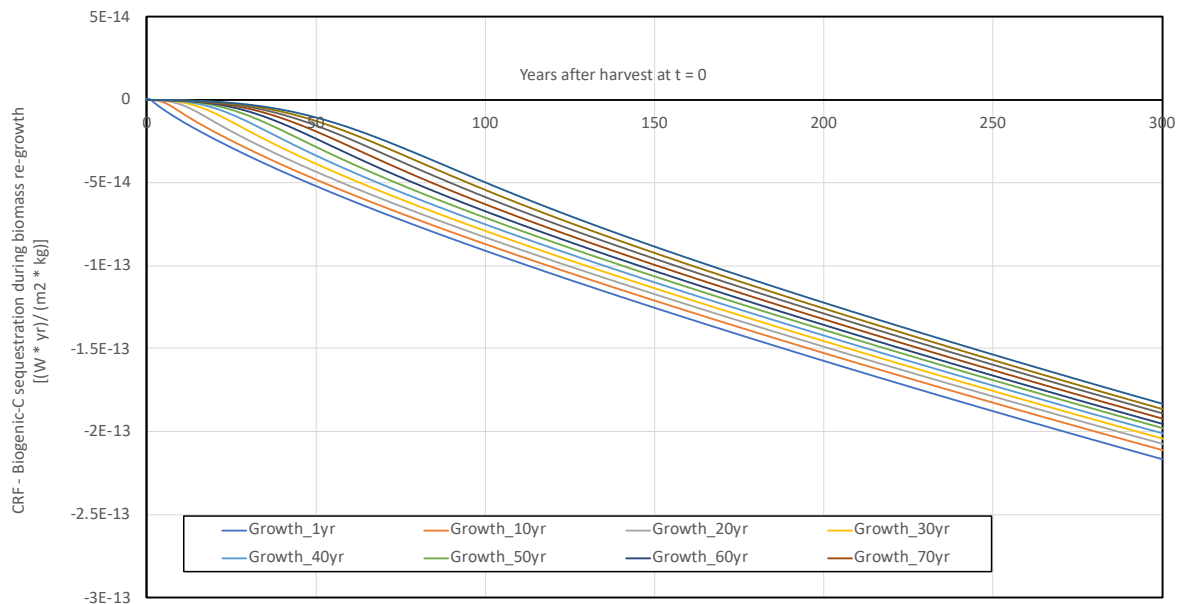

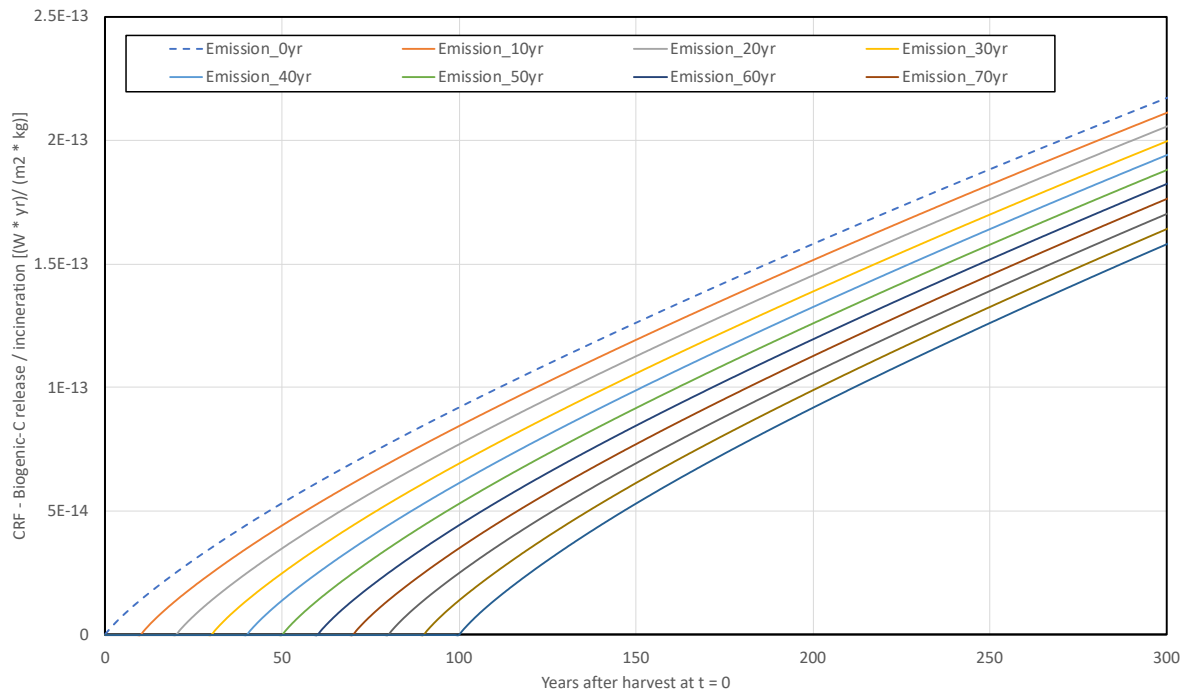

Figure S3: Cumulative Radiative Forcing Curves for C-sequestration with different biomass growth curves (top) and for C-emission through incineration with different storage time in the technosphere (bottom).

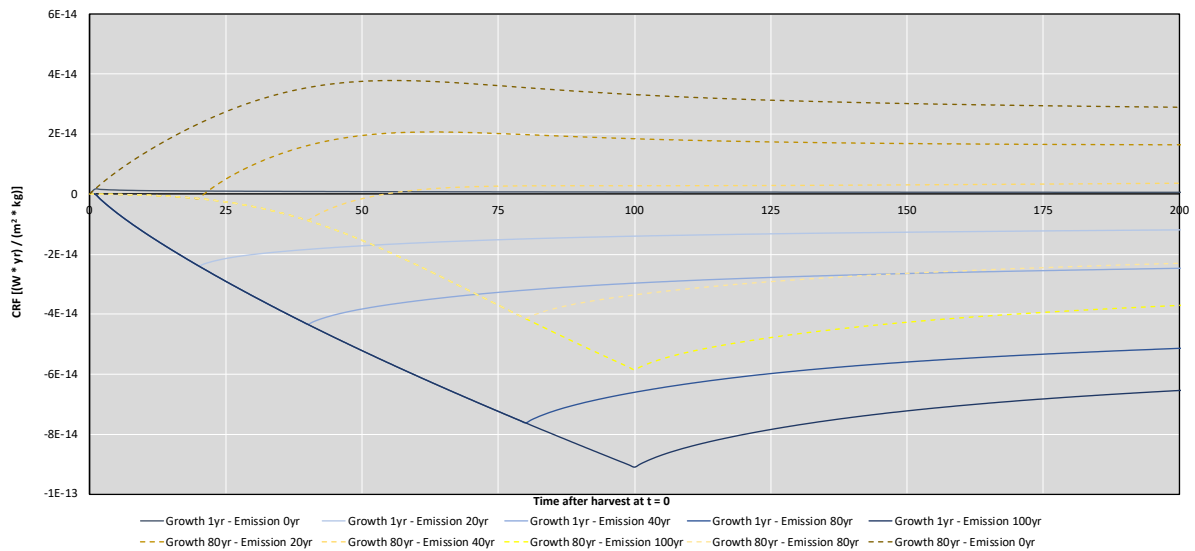

Figure S4: Explicit representation of the Cumulative Radiative Forcing curves for bio-based products using annual crops (Growth 1yr curves) and biomass feedstock with a 80 years rotation cycle (Growth 80yr), and being disposed through incineration after a useful life of 0, 20, 40, 80, or 100 years.

Figure S4 represents the curves for CRF for different possible combinations of rotation periods and EoL scenarios. Such representation provides a clear picture of the climate impacts of using different biomass feedstocks to produce bio-products with different lifetimes and different EoL treatments. Specifically, by using absolute climate metrics, the value judgement of choosing the temporal boundary of the analysis is left to the reader.

Figure S5a, represents the CRF curves explicitly in time, both for fossil-based PP and bio-based PBS. Additionally, in Figure S5b we plot the Climate Mitigation Index, simply defined as in Eq. S6.

$$CMI = \frac{(CRF_{fossil} - CRF_{bio})}{CRF_{fossil}} \quad (\text{Eq. S12})$$

This curve shows clearly that the long-term mitigation of the bio-based product is independent from the biogenic-C cycle and the effect of temporary storage is irrelevant. However, in the short-term, there is a clear advantage in storing the biogenic-C in the anthroposphere. This effect would be missed by excluding the time-dependent phenomena taking place, as highlighted also by Levasseur et al. (2010).

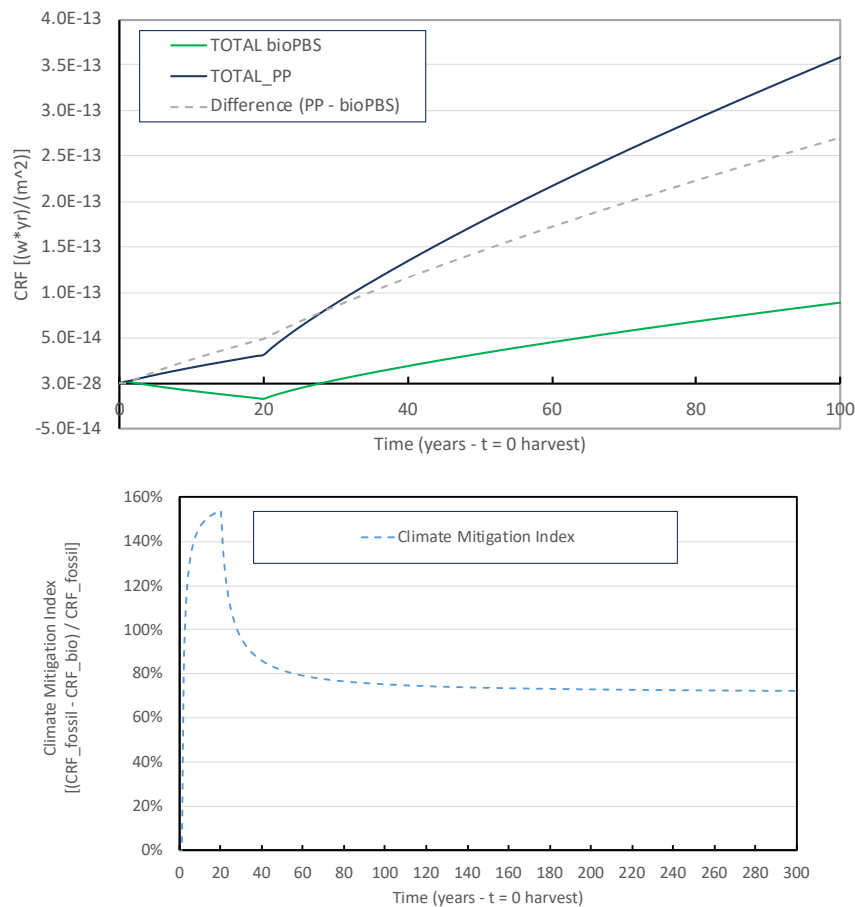

Figure S5: a) CRF curves for fossil-based PP and bio-based PBS plastics. Both curves account for supply-chain emissions at time  $t=0$  and incineration of the plastic after 20 years of use (see details on the LCI in Section 1 of this SM); b) Climate Mitigation Index between the two products.

## 2.5 GWP<sub>bio</sub> factors

While a time-explicit representation has many advantages (Giuntoli et al. 2016), reporting normalized characterization factors can be very useful for LCA practitioners, as Guest et al. (2012) illustrated.

Therefore, we normalize the CRF curves above over the same AGWP CO<sub>2</sub> factors as done by the IPCC.

$$GWP_{Growth}(100, r) = \frac{CRF_{Growth}(100, r)}{AGWP_{CO_2}(100)} \quad (\text{Eq. S13})$$

$$GWP_{Incineration}(100, j) = \frac{CRF_{Incineration}(100, j)}{AGWP_{CO_2}(100)} \quad (\text{Eq. S14})$$

$$GWP_{Landfill}(100, j) = \frac{CRF_{Landfill}(100, j)}{AGWP_{CO_2}(100)} \quad (\text{Eq. S15})$$

The characterization factors in Table S11 and Table S12 are indeed the same as presented by Guest et al. (2012), but we present them as disaggregated factors for the biomass growth and biogenic-C emission / EoL factors. These CFs can be flexibly combined to obtain the final CF for many different combinations of rotation periods and EoL scenarios. Specifically:

$$GWP_{bio}(100)_{r,j} = GWP_{growth}(100)_r + GWP_{EoL}(100)_j \quad (\text{Eq. S16})$$

$$GWP_{fossil}(100)_j = GWP_{EoL}(100)_j \quad (\text{Eq. S17})$$

Where  $i$  represents the rotation time for biomass growth, and  $j$  represents the storage time (or the use period). Looking at Figure S1, if  $t_{harvest} = t_{replanting} = t_{production} = 0$ , then  $r = t_{rotation}$  and  $j = t_{disposal}$ . Additionally, as indicated in brackets, the values are presented at a fixed time horizon of 100 years, as this is the common TH for climate change CFs in LCA.

Table S11: GWP characterization factors capturing the sequestration of 1 kg of CO<sub>2</sub> from the atmosphere during the growth of the biomass after harvest. The CFs are differentiated based on the rotation time needed for the biomass to fully regrow after harvest at  $t = 0$ .

|            | Rotation time [years] ( $r$ ) |      |      |      |      |      |      |      |      |      |      |   |
|------------|-------------------------------|------|------|------|------|------|------|------|------|------|------|---|
|            | 1                             | 10   | 20   | 30   | 40   | 50   | 60   | 70   | 80   | 90   | 100  |   |
| GWP_growth | -                             | -    | -    | -    | -    | -    | -    | -    | -    | -    | -    | - |
| h          | 0.99                          | 0.95 | 0.90 | 0.86 | 0.82 | 0.77 | 0.73 | 0.68 | 0.64 | 0.59 | 0.54 |   |

Table S12: GWP characterization factors for two different EoL scenarios (incineration and landfilling). The CFs are differentiated based on the storage period, i.e. the time at which the product is disposed.

|                  | Storage period [years] ( $j$ ) |      |      |      |      |      |      |      |      |      |      |
|------------------|--------------------------------|------|------|------|------|------|------|------|------|------|------|
|                  | 0                              | 10   | 20   | 30   | 40   | 50   | 60   | 70   | 80   | 90   | 100  |
| GWP_Incineration | 1.00                           | 0.92 | 0.84 | 0.76 | 0.67 | 0.58 | 0.48 | 0.38 | 0.27 | 0.15 | 0.00 |
| GWP_Landfill     | 0.01                           | 0.00 | 0.00 | 0.00 | 0.00 | 0.00 | 0.00 | 0.00 | 0.00 | 0.00 | 0.00 |

However, as highlighted above and as discussed in depth by UNEP/SETAC (2016), assessing different time horizons and multiple climate metrics can provide additional important information about the climate impact of a product. For this reason, we also calculate the GWP factors as a function of the time horizon considered for one specific case relevant to this paper. Figure S6 represents the GWP as a function of time for three different sources of CO<sub>2</sub>: 1) GWP<sub>bio</sub> represents the GWP(t) for biogenic-C embedded in a bio-based plastic which is produced from annual crop and is in use for 20 years before incineration; 2) GWP<sub>fossil</sub> represents the GWP(t) for fossil-CO<sub>2</sub> released from a fossil-based plastic at t = t disposal (20 years in this case); 3) GWP<sub>supply chain</sub> represents the GWP(t) for fossil-CO<sub>2</sub> released during the production of the bio-based or fossil plastic at t = 0, and it is thus always equal to 1. The exact mathematical formulation is reported in Eq. S18 and Eq. S19. The values of GWP(100) from Figure S6 are used in Figure 5 of the manuscript.

$$GWP_{bio}(t) = \frac{CRF_{Growth}(t,1) - CRF_{Incineration}(t,20)}{AGWP_{CO_2}(t)} \quad (\text{Eq. S18})$$

$$GWP_{fossil}(t) = \frac{CRF_{Incineration}(t,20)}{AGWP_{CO_2}(t)} \quad (\text{Eq. S19})$$

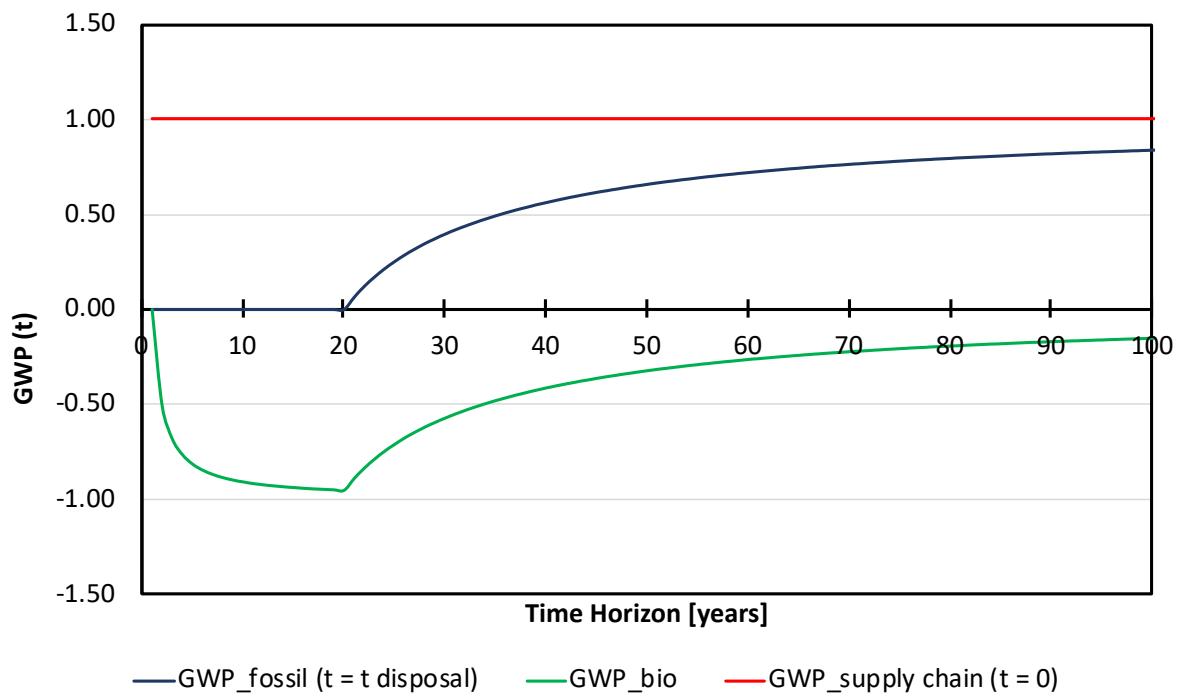

Figure S6: GWP for biogenic-C (GWP<sub>bio</sub>), for fossil-C embedded in the product (GWP<sub>fossil</sub>), and for fossil-C released during the product supply chain (GWP<sub>supply chain</sub>), as a function of the time horizon considered. Values for GWP<sub>bio</sub> consider an annual crop incinerated after 20 years of use (the value of GWP<sub>bio</sub>(100) is equal to the value obtained adding up GWP<sub>growth</sub> and GWP<sub>incineration</sub> in Table S11 and Table S12).

## References

- Albizzati, Paola Federica Tonini, D., and Astrup, T. F. (2020). Life cycle assessment and costing of high-value products from food waste: Animal feed; lactic, polylactic, and succinic acid. *Science of the Total Environment*.
- Myhre, G., D. Shindell, F.-M. Bréon, W. Collins, J. Fuglestedt, J. Huang, D. Koch, J.-F. Lamarque, D. Lee, B. Mendoza, T. Nakajima, A. Robock, G. Stephens, T. Takemura and H. Zhang, 2013: Anthropogenic and Natural Radiative Forcing. In: *Climate Change 2013: The Physical Science Basis. Contribution of Working Group I to the Fifth Assessment Report of the Intergovernmental Panel on Climate Change* [Stocker, T.F., D. Qin, G.-K. Plattner, M. Tignor, S.K. Allen, J. Boschung, A. Nauels, Y. Xia, V. Bex and P.M. Midgley (eds.)]. Cambridge University Press, Cambridge, United Kingdom and New York, NY, USA.
- Guest, G., F. Cherubini and A. H. Strømman (2012). “Global Warming Potential of Carbon Dioxide Emissions from Biomass Stored in the Anthroposphere and Used for Bioenergy at End of Life.” *Journal of Industrial Ecology*, 12(1): 20-30. doi: 10.1111/j.1530-9290.2012.00507.x
- Kwan, T.H., Hu, Y., Lin, C.S.K., 2018. Techno-economic analysis of a food waste valorisation process for lactic acid, lactide and poly(lactic acid) production. *J. Clean. Prod.* 181, 72–87. <https://doi.org/10.1016/j.jclepro.2018.01.179>.
- Levasseur, A., Lesage, P., Margni, M., Deschênes, L., Samson, R. (2010). “Considering time in LCA: Dynamic LCA and its application to global warming impact assessments”. *Environmental Science & Technology*. 44:3169-3174.
- Giuntoli J, Agostini A, Caserini S, Lugato E, Baxter D, Marelli L. (2016). “Climate change impacts of power generation from residual biomass”. *Biomass and Bioenergy* 89:146-158. doi:10.1016/j.biombioe.2016.02.024.
- UNEP/SETAC (2016). *Global Guidance for Life Cycle Impact Assessment Indicators. Volume 1*. Accessed at: <https://www.lifecycleinitiative.org/training-resources/global-guidance-lcia-indicators-v-1/>.
